# Supplementary material for: Marine Streptomyces-Derived Novel Alkaloids Discovered in the Past Decade
Source: MDPI journal article supplement (doi:10.3390/md22010051), 2024-01-22
Supplement: s1 [file s1]

**Table S1:** Detailed information for new alkaloids from marine *Streptomyces* discovered in 2013-June 2023

| No. | Compound name                       | Type                      | Strain No.                     | Source                                                                                  | Bioactivity                                                                                                                                                                                                                                            | Ref. |
|-----|-------------------------------------|---------------------------|--------------------------------|-----------------------------------------------------------------------------------------|--------------------------------------------------------------------------------------------------------------------------------------------------------------------------------------------------------------------------------------------------------|------|
| 1   | 12- <i>N</i> -methyl-k252c          | Staurosporine (Bisindole) | <i>Streptomyces</i> sp. A22    | Marine sediments of Ningbo City (Zhejiang province, China, N 29°28' E 121°57')          | Enzyme inhibition against three protein kinases PKC, BTK and ROCK2 with IC <sub>50</sub> values of 1.84, 1.51 and 0.96 μM, respectively.                                                                                                               | [1]  |
| 2   | 9-hydroxy-K252c                     | Staurosporine (Bisindole) | <i>Streptomyces</i> sp. DT-A61 | A sediment sample of Dongtou, Zhejiang Province, China (N 27°87'01.67" E 121°16'99.45") | Cytotoxic activity against PC-3 cell line with an IC <sub>50</sub> value of 8.0 μM.<br>Enzyme inhibition against three protein kinases PKC, ROCK2 and ASK1 with IC <sub>50</sub> values of 0.98, 0.34 and 0.74 μM, respectively.                       | [2]  |
| 3   | 3-hydroxy-K252c                     |                           |                                |                                                                                         | Cytotoxic activity against PC-3 cell line with an IC <sub>50</sub> value of 21 μM.<br>Enzyme inhibition against three protein kinases PKC, ROCK2 and ASK1 with IC <sub>50</sub> values of 3.2, 0.0057 and 3.0 μM, respectively.                        |      |
| 4   | 3-hydroxy-7-methoxy-K252c           |                           |                                |                                                                                         | Cytotoxic activity against PC-3 cell line with an IC <sub>50</sub> value of 18 μM.<br>Enzyme inhibition against three protein kinases PKC and ROCK2 with IC <sub>50</sub> values of 1.4 and 0.91 μM, respectively.                                     |      |
| 5   | 3'- <i>epi-N</i> -acetyl-holyrine A | Staurosporine (Bisindole) | <i>Streptomyces</i> sp. A68    | Sediments of Dongtou County (N27°49'04.44"E121°07'55.33" , Zhejiang province, China)    | Cytotoxic activity against human prostate cancer PC3 cell lines with an IC <sub>50</sub> value of 0.8 μM<br>Enzyme inhibition against three protein kinases PKC, ROCK2 and BTK with IC <sub>50</sub> values of 0.17, 0.21 and 1.45 μM, respectively.   | [3]  |
| 6   | 3'- <i>N</i> -acetyl-holyrine A     |                           |                                |                                                                                         | Cytotoxic activity against human prostate cancer PC3 cell lines with an IC <sub>50</sub> value of 16.2 μM.<br>Enzyme inhibition against three protein kinases PKC, ROCK2 and BTK with IC <sub>50</sub> values of 0.91, 2.70 and 0.35 μM, respectively. |      |
| 7   | 3'- <i>N</i> -formyl-holyrine A     |                           |                                |                                                                                         | Cytotoxic activity against human prostate cancer PC3 cell lines with an IC <sub>50</sub> value of 1.5 μM.                                                                                                                                              |      |

|    |                                              |                              |                                |                                                                                        |                                                                                                                                                                                                                                                               |     |
|----|----------------------------------------------|------------------------------|--------------------------------|----------------------------------------------------------------------------------------|---------------------------------------------------------------------------------------------------------------------------------------------------------------------------------------------------------------------------------------------------------------|-----|
|    |                                              |                              |                                |                                                                                        | Enzyme inhibition against three protein kinases PKC, ROCK2 and BTK with IC <sub>50</sub> values of 1.04, 2.15 and 1.24 $\mu$ M, respectively.                                                                                                                 |     |
| 8  | 7-oxo-holyrin A                              | Staurosporine<br>(Bisindole) | <i>Streptomyces</i> sp. NB-A13 | Marine sediments of Ningbo City (Zhejiang province, China, N 29°28.4239'E121°57.6236') | Cytotoxic activity against PC-3 and SW-620 cell lines with IC <sub>50</sub> values of $4.03 \pm 0.29$ and $2.14 \pm 0.08$ $\mu$ M, respectively.<br>Enzyme inhibition against PKC- $\theta$ protein kinases with an IC <sub>50</sub> value of 1.35 $\mu$ M.   | [4] |
| 9  | 4'-N-formyl-7-oxo-holyrin A                  |                              |                                |                                                                                        | Cytotoxic activity against PC-3 and SW-620 cell lines with IC <sub>50</sub> values of $2.05 \pm 0.06$ and $0.74 \pm 0.01$ $\mu$ M, respectively.<br>Enzyme inhibition against PKC- $\theta$ protein kinases with an IC <sub>50</sub> value of 4.48 $\mu$ M.   |     |
| 10 | 3'-(hydroxyl(oxiran-2-yl)methoxy)-holyrine A |                              |                                |                                                                                        | Cytotoxic activity against PC-3 and SW-620 cell lines with IC <sub>50</sub> values of $2.45 \pm 0.08$ and $2.00 \pm 0.19$ $\mu$ M, respectively.<br>Enzyme inhibition against PKC- $\theta$ protein kinases with an IC <sub>50</sub> value of 5.75 $\mu$ M.   |     |
| 11 | 3'-epi-5'-methoxy-K252d                      |                              |                                |                                                                                        | Cytotoxic activity against PC-3 and SW-620 cell lines with IC <sub>50</sub> values of $16.60 \pm 0.43$ and $9.54 \pm 0.65$ $\mu$ M, respectively.<br>Enzyme inhibition against PKC- $\theta$ protein kinases with an IC <sub>50</sub> value of 9.435 $\mu$ M. |     |
| 12 | 3'-epi-K252d                                 | Staurosporine<br>(Bisindole) | <i>Streptomyces</i> sp. DT-A65 | Marine sediments of Dongtou Island (Zhejiang province, China, N 27°500' E 121°100')    | Cytotoxic activity against PC-3 cell line with an IC <sub>50</sub> value of $9.67 \pm 0.37$ $\mu$ M.<br>Enzyme inhibition against protein kinases PKC and BTK with IC <sub>50</sub> values of $0.25 \pm 0.03$ and $1.91 \pm 0.07$ $\mu$ M, respectively.      | [5] |
| 13 | 2',4'-epi-K252d                              |                              |                                |                                                                                        | Cytotoxic activity against PC-3 cell line with an IC <sub>50</sub> value of $9.67 \pm 0.37$ $\mu$ M.<br>Enzyme inhibition against protein kinases PKC and BTK with IC <sub>50</sub> values of $0.35 \pm 0.02$ and $0.39 \pm 0.03$ $\mu$ M, respectively.      |     |

|    |                                 |                           |                                     |                                                                                                 |                                                                                                                                                                                                                                  |     |
|----|---------------------------------|---------------------------|-------------------------------------|-------------------------------------------------------------------------------------------------|----------------------------------------------------------------------------------------------------------------------------------------------------------------------------------------------------------------------------------|-----|
| 14 | 9-hydroxy-3'-N-acetylholyrine A | Staurosporine (Bisindole) | <i>Streptomyces</i> sp. DT-A61      | A sediment sample of Dongtou, Zhejiang Province, China (N 27°87'01.67" E 121°16'99.45")         | Enzyme inhibition against three protein kinases PKC and ROCK2 with IC <sub>50</sub> values of 0.097 and 1.4 μM, respectively.                                                                                                    | [2] |
| 15 | 3-hydroxy-3'-N-acetylholyrine A |                           |                                     |                                                                                                 | Cytotoxic activity against PC-3 cell line with an IC <sub>50</sub> value of 3.6 μM.<br>Enzyme inhibition against three protein kinases PKC, ROCK2 and ASK1 with IC <sub>50</sub> values of 0.46, 0.04 and 6.4 μM, respectively.  |     |
| 16 | 3-hydroxyholyrine A             |                           |                                     |                                                                                                 | Cytotoxic activity against PC-3 cell line with an IC <sub>50</sub> value of 3.1 μM.<br>Enzyme inhibition against three protein kinases PKC, ROCK2 and ASK1 with IC <sub>50</sub> values of 0.079, 0.15 and 1.1 μM, respectively. |     |
| 17 | 3-hydroxy-K252d                 | Staurosporine (Bisindole) | <i>Streptomyces</i> sp. OUCMDZ-3118 | A piece of deep-sea sediment (2061 m) collected in the South China Sea                          | Cytotoxic activity against A549 and MCF-7 cell lines with IC <sub>50</sub> values of 1.2 ± 0.05 μM and 1.6 ± 0.09 μM, respectively.                                                                                              | [6] |
| 18 | Streptocarbazoles C             | Staurosporine (Bisindole) | <i>Streptomyces</i> sp. DT-A65      | Marine sediments of Dongtou Island (Zhejiang province, China, N 27°500' E 121°100')             | Cytotoxic activity against PC-3 cell line with an IC <sub>50</sub> value of 41.3 ± 2.38 μM.<br>Enzyme inhibition against protein kinases BTK with an IC <sub>50</sub> value of 1.43 ± 0.13 μM.                                   | [5] |
| 19 | Streptocarbazole D              | Staurosporine (Bisindole) | <i>Streptomyces</i> sp. DT-A61      | A sediment sample of Dongtou, Zhejiang Province, China (N 27°87'01.67" E 121°16'99.45")         | Enzyme inhibition against three protein kinases PKC, ROCK2 and ASK1 with IC <sub>50</sub> values of 2.1, 0.97 and 4.1 μM, respectively.                                                                                          | [2] |
| 20 | Streptocarbazole E              |                           |                                     |                                                                                                 | Cytotoxic activity against PC-3 cell line with an IC <sub>50</sub> value of 5.6 μM.<br>Enzyme inhibition against three protein kinases PKC and ROCK2 with IC <sub>50</sub> values of 1.4 and 0.34 μM, respectively.              |     |
| 21 | Streptocarbazole F              | Staurosporine (Bisindole) | <i>Streptomyces</i> sp. OUCMDZ-5380 | A driftwood sample collected at the Beibu Gulf nearby Guangxi, China (N 21°44'39" E 108°35'22") | Cytotoxic activity against MV4-11 cancer cell with an IC <sub>50</sub> value of 0.81 ± 0.007 μM.                                                                                                                                 | [7] |
| 22 | Streptocarbazole G              |                           |                                     |                                                                                                 | Cytotoxic activity against MV4-11 cancer cell with an IC <sub>50</sub> value of 0.55 ± 0.04 μM.                                                                                                                                  |     |

|    |                                                              |                           |                                                          |                                                                                         |                                                                                                                                                                                                                                    |      |
|----|--------------------------------------------------------------|---------------------------|----------------------------------------------------------|-----------------------------------------------------------------------------------------|------------------------------------------------------------------------------------------------------------------------------------------------------------------------------------------------------------------------------------|------|
| 23 | Streptocarbazole H                                           |                           |                                                          |                                                                                         | Cytotoxic activity against MV4-11 cancer cell with an IC <sub>50</sub> value of 1.88 ± 0.11 μM.                                                                                                                                    | [2]  |
| 24 | 3'-O-demethyl-4'-N-demethyl-4'-N-acetyl-4'-epi-staurosporine | Staurosporine (Bisindole) | <i>Streptomyces</i> sp. DT-A61                           | A sediment sample of Dongtou, Zhejiang Province, China (N 27°87'01.67" E 121°16'99.45") | Cytotoxic activity against PC-3 cell line with an IC <sub>50</sub> value of 0.16 μM.<br>Enzyme inhibition against three protein kinases PKC, ROCK2 and ASK1 with IC <sub>50</sub> values of 0.092, 0.26 and 0.77 μM, respectively. |      |
| 25 | Indimicin A                                                  | Halogenated bisindole     | <i>Streptomyces</i> sp. SCSIO 03032                      | deep-sea                                                                                | -                                                                                                                                                                                                                                  | [8]  |
| 26 | Indimicin B                                                  |                           |                                                          |                                                                                         | Cytotoxic activity against MCF-7 cell line with an IC <sub>50</sub> value of 10.0 μM.                                                                                                                                              |      |
| 27 | Indimicin C                                                  |                           |                                                          |                                                                                         | -                                                                                                                                                                                                                                  |      |
| 28 | Indimicin D                                                  |                           |                                                          |                                                                                         | -                                                                                                                                                                                                                                  |      |
| 29 | Indimicin E                                                  |                           |                                                          |                                                                                         | -                                                                                                                                                                                                                                  |      |
| 30 | Lynamycin F                                                  |                           |                                                          |                                                                                         | -                                                                                                                                                                                                                                  |      |
| 31 | Lynamycin G                                                  |                           |                                                          |                                                                                         | -                                                                                                                                                                                                                                  |      |
| 32 | Spiroindimicin G                                             | Halogenated bisindole     | <i>Streptomyces</i> sp. SCSIO 03032 $\Delta$ <i>spmH</i> | deep-sea                                                                                | Cytotoxic activity against four cancer cell lines SF-268, MCF-7, HepG2 and A549 with IC <sub>50</sub> values of 10.28 ± 0.14-19.11 ± 2.23 μM.                                                                                      | [9]  |
| 33 | Spiroindimicin H                                             |                           |                                                          |                                                                                         | Cytotoxic activity against four cancer cell lines SF-268, MCF-7, HepG2 and A549 with IC <sub>50</sub> values of 18.16 ± 0.59-33.02 ± 3.41 μM.                                                                                      |      |
| 34 | Indimicin F                                                  |                           |                                                          |                                                                                         | -                                                                                                                                                                                                                                  |      |
| 35 | Indimicin G                                                  |                           |                                                          |                                                                                         | -                                                                                                                                                                                                                                  |      |
| 36 | Spiroindimicin E                                             | Halogenated bisindole     | <i>Streptomyces</i> sp. MP131-18                         | A deep-water marine sediment sample collected in the Trondheim fjord, Norway            | Weak cytotoxic activity against T24 bladder carcinoma cells                                                                                                                                                                        | [10] |
| 37 | Spiroindimicin F                                             |                           |                                                          |                                                                                         | -                                                                                                                                                                                                                                  |      |
| 38 | dionemycin                                                   | Halogenated bisindole     | <i>Streptomyces</i> sp. SCSIO 11791                      | A sediment sample collected from the South China Sea                                    | Cytotoxic activity against six cancer cell lines MDA-MB-435, MDA-MB-231, NCI-H460, HCT-116, HepG2 and MCF10A with IC <sub>50</sub> values of 3.1–                                                                                  | [11] |

|    |                                         |                         |                                       |                                                                                                                                                  |                                                                                                                                                                                                                                                                        |      |
|----|-----------------------------------------|-------------------------|---------------------------------------|--------------------------------------------------------------------------------------------------------------------------------------------------|------------------------------------------------------------------------------------------------------------------------------------------------------------------------------------------------------------------------------------------------------------------------|------|
|    |                                         |                         |                                       |                                                                                                                                                  | 11.2 $\mu$ M.<br>Antimicrobial activity against <i>M. luteus</i> and <i>S. aureus</i> with MIC values of 0.5 and 1 $\mu$ M, respectively.                                                                                                                              |      |
| 39 | 6-OMe-7',7''-dichorochromopyrrolic acid |                         |                                       |                                                                                                                                                  | Cytotoxic activity against four cancer cell lines MDA-MB-435, HCT-116, HepG-2 and MCF-10A with IC <sub>50</sub> values of 2.9–19.4 $\mu$ M.<br>Antimicrobial activity against <i>M. luteus</i> and <i>S. aureus</i> with MIC values of 16 and 3 $\mu$ M, respectively. |      |
| 40 | Xiamycin C                              | Indole sesquiterpenoid  | <i>Streptomyces</i> sp. HK-18         | A saltern sediment sample was collected on Shinui Island (445-9, Sangtaeseo-ri, Shinui-myeon, Shinan-gun, Jollanam-do) in the Republic of Korea. | Antiviral activity against porcine epidemic diarrhea virus (PEDV) with an EC <sub>50</sub> value of 11.49 $\pm$ 1.36 $\mu$ M.                                                                                                                                          | [12] |
| 41 | Xiamycin D                              |                         |                                       |                                                                                                                                                  | Antiviral activity against porcine epidemic diarrhea virus (PEDV) with an EC <sub>50</sub> value of 0.93 $\pm$ 0.07 $\mu$ M.                                                                                                                                           |      |
| 42 | Xiamycin E                              |                         |                                       |                                                                                                                                                  | Antiviral activity against porcine epidemic diarrhea virus (PEDV) with an EC <sub>50</sub> value of 2.89 $\pm$ 0.36 $\mu$ M.                                                                                                                                           |      |
| 43 | Lipoxiamycin A                          | Indole sesquiterpenoid  | <i>Streptomyces</i> sp. HK-18         | A saltern sediment sample was collected on Shinui Island (445-9, Sangtaeseo-ri, Shinui-myeon, Shinan-gun, Jollanam-do) in the Republic of Korea. | Moderately inhibited the production of lipopolysaccharide-induced NO with an IC <sub>50</sub> value of 9.89 $\pm$ 0.92 $\mu$ M.                                                                                                                                        | [13] |
| 44 | Lipoxiamycin B                          |                         |                                       |                                                                                                                                                  | -                                                                                                                                                                                                                                                                      |      |
| 45 | Dixiamycin A                            |                         |                                       |                                                                                                                                                  | Significantly inhibited the production of lipopolysaccharide-induced NO with an IC <sub>50</sub> value of 4.12 $\pm$ 0.22 $\mu$ M.                                                                                                                                     |      |
| 46 | Dixiamycin C                            |                         |                                       |                                                                                                                                                  | -                                                                                                                                                                                                                                                                      |      |
| 47 | Pratensilin A                           | Indolinone-naphthofuran | <i>Streptomyces pratensis</i> KCB-132 | A marine sediment collected off the Bohai Sea, China                                                                                             | Cytotoxic activity against six cancer cell lines NCI-H1975, NCI-H460, JHH-7, C6, HepG2 and THP-1 with IC <sub>50</sub> values of 18.4–67.4 $\mu$ M.                                                                                                                    | [14] |
| 48 | Pratensilin B                           |                         |                                       |                                                                                                                                                  | -                                                                                                                                                                                                                                                                      |      |
| 49 | Pratensilin C                           |                         |                                       |                                                                                                                                                  | -                                                                                                                                                                                                                                                                      |      |

|    |                   |                         |                                             |                                                                                                                                                              |                                                                                                                                                                                                                              |      |
|----|-------------------|-------------------------|---------------------------------------------|--------------------------------------------------------------------------------------------------------------------------------------------------------------|------------------------------------------------------------------------------------------------------------------------------------------------------------------------------------------------------------------------------|------|
| 50 | Pratensilin D     | Indolinone-naphthofuran | <i>Streptomyces pratensis</i> KCB-132       | A marine sediment collected off the Bohai Sea, China                                                                                                         | (-)- <b>51</b> exhibited antibacterial activity against <i>B. cereus</i> with an MIC value of 4 µg/mL and cytotoxic effect on NCI-H460 and HepG2 cell lines with IC <sub>50</sub> values of 4.6 and 9.3 µg/mL, respectively. | [15] |
| 51 | Anthranoside C    | Miscellaneous indole    | <i>Streptomyces</i> sp. CMN-62              | An unidentified sponge sample collected from NaoZhou Island of the Guangdong Province, China                                                                 | Antiviral activity against influenza A H <sub>1</sub> N <sub>1</sub> virus with an IC <sub>50</sub> value of 171 µM.                                                                                                         | [16] |
| 52 | Streptoindole A   | Miscellaneous indole    | <i>Streptomyces</i> sp. ZZ1118              | A gut sample of marine shrimp ( <i>Penaeus</i> sp.) obtained from fishing vessel operating in East China Sea, close to Zhoushan archipelago, Zhejiang, China | Antimicrobial activity against MRSA, <i>E. coli</i> and <i>C. albicans</i> with MIC values of 13–25 µg/mL.                                                                                                                   | [17] |
| 53 | Streptoindole B   |                         |                                             |                                                                                                                                                              | Antimicrobial activity against MRSA, <i>E. coli</i> and <i>C. albicans</i> with MIC values of 7–25 µg/mL.                                                                                                                    |      |
| 54 | Streptoindole C   |                         |                                             |                                                                                                                                                              | Antimicrobial activity against <i>E. coli</i> and <i>C. albicans</i> with both MIC values of 7 µg/mL.                                                                                                                        |      |
| 55 | Streptoindole D   |                         |                                             |                                                                                                                                                              | Antimicrobial activity against MRSA with a MIC value of 25 µg/mL.                                                                                                                                                            |      |
| 56 | tirandamycin K    | Pyrrolidone             | <i>Streptomyces</i> sp. 307–9 $\Delta tamI$ | Marine-derived                                                                                                                                               | -                                                                                                                                                                                                                            | [18] |
| 57 | Isotirandamycin B | Pyrrolidone             | <i>Streptomyces</i> sp. SCSIO 41399         | The <i>Porites</i> sp. coral collected from the Wenchang, Hainan province of China                                                                           | Antimicrobial activity against <i>S. agalactiae</i> with a MIC value of 5.0 µg/mL.                                                                                                                                           | [19] |
| 58 | Tirandamycin A    |                         |                                             |                                                                                                                                                              | Antimicrobial activity against <i>S. agalactiae</i> with a MIC value of 2.5 µg/mL.                                                                                                                                           |      |
| 59 | Tirandamycin B    |                         |                                             |                                                                                                                                                              | Antimicrobial activity against <i>S. agalactiae</i> with a MIC value of 2.5 µg/mL.                                                                                                                                           |      |
| 60 | Thiolopyrrolone A | Pyrrolone               | <i>Streptomyces</i> sp. BTBU20218885        | A mud sample collected from the intertidal zone, Xiamen, China                                                                                               | Antimicrobial activity against BCG, <i>M. tuberculosis</i> and <i>S. aureus</i> with MIC values of 10, 10 and 100 µg/mL, respectively.                                                                                       | [20] |

|    |                                             |                        |                                                                                    |                                                                                                            |                                                                                                                                                                                                                             |      |
|----|---------------------------------------------|------------------------|------------------------------------------------------------------------------------|------------------------------------------------------------------------------------------------------------|-----------------------------------------------------------------------------------------------------------------------------------------------------------------------------------------------------------------------------|------|
| 61 | 2,2-dioxidothiolutin                        |                        |                                                                                    |                                                                                                            | Antimicrobial activity against <i>S. aureus</i> with a MIC value of 50 µg/mL.                                                                                                                                               |      |
| 62 | Bacillimide                                 | Pyrrolone              | <i>Streptomyces bacillaris</i> MBTC38                                              | Underwater sediment samples on Jeju Island                                                                 | Enzyme inhibition against <i>C. albicans</i> isocitrate lyase with an IC <sub>50</sub> value of 44.24 µM.                                                                                                                   | [21] |
| 63 | Salinazinone A                              | Pyrrolidinyl-oxazinone | <i>Streptomyces</i> sp. KMF-004                                                    | A solar saltern at Aphae Island in Korea                                                                   | -                                                                                                                                                                                                                           | [22] |
| 64 | Salinazinone B                              |                        |                                                                                    |                                                                                                            | An inhibitory effect on LPS-induced NO production by BV-2 microglia cells with an IC <sub>50</sub> value of 17.7 µM.                                                                                                        |      |
| 66 | Anandin A                                   | Pyrrolidone            | <i>Streptomyces anandii</i> H41-59                                                 | A sea sediment sample from the mangrove zone in the South China Sea                                        | Cytotoxic activity against three cancer cell lines MCF-7, SF-268 and NCI-H460 with IC <sub>50</sub> values of 7.5, 7.9 and 7.8 µg/mL, respectively.                                                                         | [23] |
| 67 | Anandin B                                   |                        |                                                                                    |                                                                                                            | -                                                                                                                                                                                                                           |      |
| 68 | Ligiamycin A                                | pyrrolidone            | Co-culture of <i>Streptomyces</i> sp.GET02.ST and <i>Achromobacter</i> sp.GET02.AC | A gut sample of the wharf roaches <i>Ligia exotica</i> from the intertidal zone of the west coast of Korea | Antimicrobial activity against <i>S. aureus</i> and <i>S. enterica</i> with both MIC values of 16 µg/mL. Cytotoxic activity against A549 cell line with an IC <sub>50</sub> value of 42.0 µM.                               | [24] |
| 69 | Ligiamycin B                                |                        |                                                                                    |                                                                                                            | Antimicrobial activity against <i>S. aureus</i> with a MIC value of 64 µg/mL. Cytotoxic activity against five cancer cell lines SNU638, SK-HEP-1, A549, HCT-116 and MDA-MB-23 with IC <sub>50</sub> values of 20.1-46.2 µM. |      |
| 70 | Oxoprothracarcin                            | pyrrolobenzodiazepine  | <i>Streptomyces</i> sp. M10946                                                     | Mangrove sediment collected from Hut Bay                                                                   | Antiproliferative effects against MDA-MB-231 cells and A549 cells at a concentration of 10 µM with growth inhibition rates of 10.2% and 7.3%                                                                                | [25] |
| 71 | 7-methoxy-8-hydroxy cycloanthranilylproline | pyrrolobenzodiazepine  | <i>Streptomyces cacaoi</i> 14CM034                                                 | The sediments that collected from Mersin-Turkey at a depth of 8 m Mediterranean Sea                        | Antimicrobial activity against <i>E. coli</i> , MRSA, <i>E. faecium</i> , <i>Paeruginosa</i> and <i>C. albicans</i> with MIC values of 8.75-17.5 µg/mL.                                                                     | [26] |
| 72 | Cycloanthranilylproline                     |                        |                                                                                    |                                                                                                            | Antimicrobial activity against <i>E. coli</i> , MRSA, <i>E. faecium</i> , <i>Paeruginosa</i> and <i>C. albicans</i> with MIC                                                                                                |      |

|    |            |                        |                                                              |                                                                                                                                  |                                                                                                                                                                                                                                               |      |
|----|------------|------------------------|--------------------------------------------------------------|----------------------------------------------------------------------------------------------------------------------------------|-----------------------------------------------------------------------------------------------------------------------------------------------------------------------------------------------------------------------------------------------|------|
|    |            |                        |                                                              |                                                                                                                                  | values of 16-32 µg/mL.                                                                                                                                                                                                                        |      |
| 73 | Hygrocin C | Ansamycin<br>(Pyrrole) | <i>Streptomyces</i> sp.<br>LZ35ΔGPKS                         | Intertidal soil collected at<br>Jimei, Xiamen, China                                                                             | Cytotoxic activity against MDA-MB-431 and PC3 cell lines with IC <sub>50</sub> values of 0.5 and 1.9 µg/mL, respectively.                                                                                                                     | [27] |
| 74 | Hygrocin D |                        |                                                              |                                                                                                                                  | Cytotoxic activity against MDA-MB-431 and PC3 cell lines with IC <sub>50</sub> values of 3.0 and 5.0 µg/mL, respectively.                                                                                                                     |      |
| 75 | Hygrocin E |                        |                                                              |                                                                                                                                  | -                                                                                                                                                                                                                                             |      |
| 76 | Hygrocin F |                        |                                                              |                                                                                                                                  | Cytotoxic activity against MDA-MB-431 and PC3 cell lines with IC <sub>50</sub> values of 3.3 and 4.5 µg/mL, respectively.                                                                                                                     |      |
| 77 | Hygrocin H | Ansamycin<br>(Pyrrole) | <i>Streptomyces</i> sp.<br>LZ35 mutant strain<br>SR101OEhgc1 | Intertidal soil collected at<br>Jimei, Xiamen, China                                                                             | Cytotoxic activity against MDA-MB-231, PC3 and HeLa cell lines with IC <sub>50</sub> values of 2.4, 1.7, and 0.8 µM, respectively.                                                                                                            | [28] |
| 78 | Hygrocin I |                        |                                                              |                                                                                                                                  | -                                                                                                                                                                                                                                             |      |
| 79 | Hygrocin G |                        |                                                              |                                                                                                                                  | -                                                                                                                                                                                                                                             |      |
| 80 | Hygrocin K | Ansamycin<br>(Pyrrole) | <i>Streptomyces</i> sp.<br>ZZ1956                            | A marine mud sample collected from the mangrove area (4.15° S, 119.61° E) of Pangkep District South Sulawesi Province, Indonesia | -                                                                                                                                                                                                                                             | [29] |
| 81 | Hygrocin L |                        |                                                              |                                                                                                                                  | -                                                                                                                                                                                                                                             |      |
| 82 | Hygrocin M |                        |                                                              |                                                                                                                                  | -                                                                                                                                                                                                                                             |      |
| 83 | Hygrocin N |                        |                                                              |                                                                                                                                  | Cytotoxic activity against U87MG and U251 cell lines with IC <sub>50</sub> values of 8.17 ± 0.17 and 7.04 ± 0.28 µM, respectively.<br>Antimicrobial activity against MRSA and <i>E. coli</i> with MIC values of 15 and 8 µg/mL, respectively. |      |
| 84 | Hygrocin O |                        |                                                              |                                                                                                                                  | Antimicrobial activity against MRSA and <i>E. coli</i> with MIC values of 24 and 20 µg/mL, respectively.                                                                                                                                      |      |
| 85 | Hygrocin P |                        |                                                              |                                                                                                                                  | -                                                                                                                                                                                                                                             |      |



|    |                |                       |                                 |                                                                     |                                                                                                                                                                                                                                               |      |
|----|----------------|-----------------------|---------------------------------|---------------------------------------------------------------------|-----------------------------------------------------------------------------------------------------------------------------------------------------------------------------------------------------------------------------------------------|------|
| 86 | Hygrocin Q     |                       |                                 |                                                                     | Cytotoxic activity against U87MG and U251 cell lines with IC <sub>50</sub> values of 8.81 ± 0.80 and 10.46 ± 0.27 μM, respectively.                                                                                                           |      |
| 87 | Hygrocin R     |                       |                                 |                                                                     | Cytotoxic activity against U87MG and U251 cell lines with IC <sub>50</sub> values of 8.32 ± 0.38 and 7.86 ± 0.26 μM, respectively.<br>Antimicrobial activity against MRSA and <i>E. coli</i> with MIC values of 9 and 16 μg/mL, respectively. |      |
| 88 | Hygrocin S     |                       |                                 |                                                                     | -                                                                                                                                                                                                                                             |      |
| 89 | Ansalactam B   | Ansamycin (Pyrrole)   | <i>Streptomyces</i> sp. CNH189  | Aangrove sediment sample, Danzhou, China                            | Weak antimicrobial activity against MRSA with a MIC value of 31.2 μg/mL.                                                                                                                                                                      | [30] |
| 90 | Ansalactam C   |                       |                                 |                                                                     | Weak antimicrobial activity against MRSA with a MIC value of 31.2 μg/mL.                                                                                                                                                                      |      |
| 91 | Ansalactam D   |                       |                                 |                                                                     | Weak antimicrobial activity against MRSA with a MIC value of 62.5 μg/mL.                                                                                                                                                                      |      |
| 92 | Divergolide T  | Ansamycin (Pyrrole)   | <i>Streptomyces</i> sp. KFD18   | Mangrove sediment, collected from Danzhou, Hainan province in China | Cytotoxic activity against human cancer cell lines SGC-7901, K562, Hela and A549 with IC <sub>50</sub> values of 2.8-14.9 μM.                                                                                                                 | [31] |
| 93 | Divergolide U  |                       |                                 |                                                                     | Cytotoxic activity against human cancer cell lines SGC-7901, K562 and A549 with IC <sub>50</sub> values of 9.0-24.7 μM.                                                                                                                       |      |
| 94 | Divergolide V  |                       |                                 |                                                                     | Cytotoxic activity against human cancer cell lines SGC-7901, K562, Hela and A549 with IC <sub>50</sub> values of 4.7-20.9 μM.                                                                                                                 |      |
| 95 | Divergolide W  |                       |                                 |                                                                     | Cytotoxic activity against human cancer cell lines SGC-7901, K562, Hela and A549 with IC <sub>50</sub> values of 16.3-33.2 μM.                                                                                                                |      |
| 96 | Chlorizidine A | Miscellaneous pyrrole | <i>Streptomyces</i> sp. CNH-287 | Marine-derived                                                      | Cytotoxic activity against HCT-116 cell line with IC <sub>50</sub> values of 3.2-4.9 μM.                                                                                                                                                      | [32] |

|     |                                        |                       |                                             |                                                                                     |                                                                                                                                                                                                                                                                                    |      |
|-----|----------------------------------------|-----------------------|---------------------------------------------|-------------------------------------------------------------------------------------|------------------------------------------------------------------------------------------------------------------------------------------------------------------------------------------------------------------------------------------------------------------------------------|------|
| 97  | Streptopyrrole B                       | Miscellaneous pyrrole | <i>Streptomyces zhaozhouensis</i> 208DD-064 | Marine sediment samples collected offshore of Dokdo Island, Republic of Korea       | Antimicrobial activity against <i>B. subtilis</i> , <i>M. luteus</i> and <i>S. aureus</i> with all MIC values of 0.8 $\mu$ M. Cytotoxic activity against six cancer cell lines PC-3, NCI-H23, HCT-15, NUGC-3, ACHN and MDA-MB-231 with IC <sub>50</sub> values of 4.9-6.6 $\mu$ M. | [33] |
| 98  | Streptopyrrole C                       |                       |                                             |                                                                                     | Antimicrobial activity against <i>B. subtilis</i> , <i>M. luteus</i> and <i>S. aureus</i> with MIC values of 0.7-2.9 $\mu$ M.                                                                                                                                                      |      |
| 99  | 16-deethylindanomycin                  | Miscellaneous pyrrole | <i>Streptomyces antibioticus</i> PTZ0016    | Marine sediments                                                                    | Antimicrobial activity against <i>S. aureus</i> with a MIC value of 4.0 $\mu$ M.                                                                                                                                                                                                   | [34] |
| 100 | iso-16-deethylindanomycin              |                       |                                             |                                                                                     | Antimicrobial activity against <i>S. aureus</i> with a MIC value of 6.0 $\mu$ M.                                                                                                                                                                                                   |      |
| 101 | 16-deethylindanomycin methyl ester     |                       |                                             |                                                                                     | Antimicrobial activity against <i>S. aureus</i> with a MIC value of 6.0 $\mu$ M.                                                                                                                                                                                                   |      |
| 102 | iso-16-deethylindanomycin methyl ester |                       |                                             |                                                                                     | Antimicrobial activity against <i>S. aureus</i> with a MIC value of 8.0 $\mu$ M.                                                                                                                                                                                                   |      |
| 103 | Nitricquinomycin A                     | Miscellaneous pyrrole | <i>Streptomyces</i> sp. ZS-A45              | Marine sediments of Zhou Shan Island (29°56' N, 122°16' E) Zhejiang province, China | -                                                                                                                                                                                                                                                                                  | [35] |
| 104 | Nitricquinomycin B                     |                       |                                             |                                                                                     | -                                                                                                                                                                                                                                                                                  |      |
| 105 | Nitricquinomycin C                     |                       |                                             |                                                                                     | Cytotoxic activity against PC-3 and A2780 cell lines with IC <sub>50</sub> values of 17.28 $\pm$ 0.60 and 4.77 $\pm$ 0.03 $\mu$ M, respectively. Antimicrobial activity against <i>E. coli</i> , <i>S. aureus</i> and <i>C. albicans</i> with MIC values of 20-40 $\mu$ M.         |      |
| 106 | Bhimamycin J                           | Miscellaneous pyrrole | <i>Streptomyces</i> sp. MS180069            | A sediment sample collected by gravity corer from the South China Sea               | Enzyme inhibition against ACE2 with inhibition rate of 70% at 25 $\mu$ g/mL.                                                                                                                                                                                                       | [36] |
| 107 | Glaciapyrrole D                        | Miscellaneous pyrrole | <i>Streptomyces</i> sp. GGS53               | A deep-sea sediment core collected in the East Sea of                               | -                                                                                                                                                                                                                                                                                  | [37] |

|     |                                                         |                       |                                              |                                                                                                                                                                             |                                                                                                                                                               |      |
|-----|---------------------------------------------------------|-----------------------|----------------------------------------------|-----------------------------------------------------------------------------------------------------------------------------------------------------------------------------|---------------------------------------------------------------------------------------------------------------------------------------------------------------|------|
| 108 | Glaciapyrrole E                                         |                       |                                              | Korea (37°12.0486', 130°25.0889', ca. 2163 m in water depth)                                                                                                                | Significant antiviral activity and resulted in the reduction of the viral titer by 70%.                                                                       |      |
| 109 | Pulicatin J                                             | oxazole and thiazole  | <i>Streptomyces diastaticus</i> NBU2966      | A marine sponge <i>Axinellida</i> sp. at 76 m depth in the Mesophotic Coral Ecosystems located near Apo Island, Negros Oriental, Philippines (9°04'33.0" N, 123°15'59.1" E) | -                                                                                                                                                             | [38] |
| 110 | Thiazostatin C                                          |                       |                                              |                                                                                                                                                                             | -                                                                                                                                                             |      |
| 111 | Thiazostatin B                                          |                       |                                              |                                                                                                                                                                             | -                                                                                                                                                             |      |
| 112 | Spoxazomicin E                                          |                       |                                              |                                                                                                                                                                             | -                                                                                                                                                             |      |
| 113 | Streptochelin A                                         |                       |                                              |                                                                                                                                                                             | -                                                                                                                                                             |      |
| 114 | Piericidin F                                            | Piericidin (Pyridine) | <i>Streptomyces</i> sp. CHQ-64 $\Delta$ rdmF | Reed rhizosphere soil collected from the mangrove conservation area of Guangdong Province, China.                                                                           | Cytotoxic activity against four cancer cell lines HeLa, NB4, A549 and H1975 with IC <sub>50</sub> values of 0.003-0.56 $\mu$ M.                               | [39] |
| 115 | 11-demethyl-piericidin A                                | Piericidin (Pyridine) | <i>Streptomyces psammoticus</i> SCSIO NS126  | A mangrove sediment sample collected from the Pearl River estuary (E 113°33'11.15", N 22°53'40.16") to South China Sea                                                      | Cytotoxic activity against two renal carcinoma cell lines ACHN and OS-RC-2 with IC <sub>50</sub> values of 4.1 and 11 $\mu$ M, respectively.                  | [40] |
| 116 | (2E,5E,7E,11E,9R,10R,13S,19R)-13,19-Dihydroxyl-IT-143-A |                       |                                              |                                                                                                                                                                             | Cytotoxic activity against two renal carcinoma cell lines ACHN and OS-RC-2 with IC <sub>50</sub> values of 2.4 and 5.3 $\mu$ M, respectively.                 |      |
| 117 | (2E,5E,7E,11E,9R,10R,13R,19S)-13,19-Dihydroxyl-IT-143-A |                       |                                              |                                                                                                                                                                             | Cytotoxic activity against two renal carcinoma cell lines ACHN and OS-RC-2 with IC <sub>50</sub> values of 3.8 and 4.1 $\mu$ M, respectively.                 |      |
| 118 | 10-Ketone piericidin A                                  |                       |                                              |                                                                                                                                                                             | Cytotoxic activity against renal carcinoma cell line OS-RC-2 with an IC <sub>50</sub> value of 22 $\mu$ M.                                                    |      |
| 119 | 7-Demethylglucopiericidin A                             |                       |                                              |                                                                                                                                                                             | Cytotoxic activity against three renal carcinoma cell lines ACHN, OS-RC-2 and 786-O with IC <sub>50</sub> values of 0.31, 2.6 and 0.99 $\mu$ M, respectively. |      |
| 120 | 7-Demethyl-13-hydroxyglucopiericidin A                  |                       |                                              |                                                                                                                                                                             | Cytotoxic activity against three renal carcinoma cell lines ACHN, OS-RC-2 and 786-O with IC <sub>50</sub>                                                     |      |

|     |                                                                                                                             |  |  |  |                                                                                                                                                           |  |
|-----|-----------------------------------------------------------------------------------------------------------------------------|--|--|--|-----------------------------------------------------------------------------------------------------------------------------------------------------------|--|
|     |                                                                                                                             |  |  |  | values of 2.5, 79 and 28 $\mu$ M, respectively.                                                                                                           |  |
| 121 | 13-Hydroxypiericidin A 10- <i>O</i> - $\alpha$ -D-galactose (1 $\rightarrow$ 6)- $\beta$ -D-glucoside                       |  |  |  | -                                                                                                                                                         |  |
| 122 | 13-Hydroxypiericidin A 10- <i>O</i> - $\alpha$ -D-glucose (1 $\rightarrow$ 6)- $\beta$ -D-glucoside                         |  |  |  | Cytotoxic activity against renal carcinoma cell line ACHN with an IC <sub>50</sub> value of 23 $\mu$ M.                                                   |  |
| 123 | 4'- <i>O</i> - $\beta$ -D-Glucose glucopiericidin A                                                                         |  |  |  | Cytotoxic activity against renal carcinoma cell line ACHN with an IC <sub>50</sub> value of 28 $\mu$ M.                                                   |  |
| 124 | 4'- <i>O</i> - $\beta$ -D-Glucose 13-hydroxyglucopiericidin A                                                               |  |  |  | -                                                                                                                                                         |  |
| 125 | 4'- <i>O</i> - $\beta$ -D-Glucose piericidin A 10- <i>O</i> - $\alpha$ -D-glucose (1 $\rightarrow$ 6)- $\beta$ -D-glucoside |  |  |  | -                                                                                                                                                         |  |
| 126 | 5-Hydroxy-6-hydroxymethyl glucopiericidin A                                                                                 |  |  |  | Cytotoxic activity against renal carcinoma cell line ACHN with an IC <sub>50</sub> value of 2.4 $\mu$ M.                                                  |  |
| 127 | 5-Hydroxy-6-hydroxymethyl-13-hydroxyglucopiericidin A                                                                       |  |  |  | Cytotoxic activity against renal carcinoma cell line ACHN with an IC <sub>50</sub> value of 60 $\mu$ M.                                                   |  |
| 128 | 2-Hydroxymethyl- $\Delta$ 3, 4-glucopiericidin A                                                                            |  |  |  | Cytotoxic activity against three renal carcinoma cell lines ACHN, OS-RC-2 and 786-O with IC <sub>50</sub> values of 1.7, 60 and 28 $\mu$ M, respectively. |  |
| 129 | (11 <i>S</i> ,12 <i>R</i> )Piericidin C1 10- <i>O</i> - $\beta$ -D-glucoside                                                |  |  |  | Cytotoxic activity against three renal carcinoma cell lines ACHN, OS-RC-2 and 786-O with IC <sub>50</sub> values of 2.8, 30 and 19 $\mu$ M, respectively. |  |
| 130 | (11 <i>R</i> ,12 <i>S</i> )Piericidin C1 10- <i>O</i> - $\beta$ -D-glucoside                                                |  |  |  | -                                                                                                                                                         |  |
| 131 | 13-Dimethoxy glucopiericidin A                                                                                              |  |  |  | -                                                                                                                                                         |  |

|     |                   |                          |                                          |                                                                                                                                   |                                                                                                                                                                                |      |
|-----|-------------------|--------------------------|------------------------------------------|-----------------------------------------------------------------------------------------------------------------------------------|--------------------------------------------------------------------------------------------------------------------------------------------------------------------------------|------|
| 132 | Piericidin A5     | Piericidin<br>(Pyridine) | <i>Streptomyces</i> sp.<br>SCSIO 40063   | A sediment sample (E 111° 41', N 16°33') at the depth of 10 m collected from Yagong island of Sansha City, Hainan Province, China | -                                                                                                                                                                              | [41] |
| 133 | Piericidin G1     |                          |                                          |                                                                                                                                   | Cytotoxic activity against four cancer cell lines SF-268, MCF-7, HepG2 and A549 with IC <sub>50</sub> values of 10.0-12.7 µM.                                                  |      |
| 134 | Actinoquinoline A | Quinoline                | <i>Streptomyces</i> sp.<br>CNP975        | A marine sediment sample collected in La Jolla, CA, USA by Alejandra Prieto Davó                                                  | Inhibition of COX-1 and COX-2 with IC <sub>50</sub> values of 7.6 and 2.13 µM, respectively.                                                                                   | [42] |
| 135 | Actinoquinoline B |                          |                                          |                                                                                                                                   | Inhibition of COX-1 and COX-2 with IC <sub>50</sub> values of 4.9 and 1.42 µM, respectively.                                                                                   |      |
| 136 | Unnamed           | Quinoline                | <i>Streptomyces cyaneofuscatus</i> M-157 | A solitary coral belonging to the order Scleractinia collected at 2000 m depth in Cantabrian Sea, Biscay Bay, Northeast Atlantic  | Weak cytotoxic activity against HepG2 cell line with an IC <sub>50</sub> value of 51.5 µM.                                                                                     | [43] |
| 137 | Unnamed           |                          |                                          |                                                                                                                                   | -                                                                                                                                                                              |      |
| 138 | Unnamed           |                          |                                          |                                                                                                                                   | -                                                                                                                                                                              |      |
| 139 | Diazaquinomycin E | Diaza-anthracene         | <i>Streptomyces</i> sp.<br>F001          | Marine-derived                                                                                                                    | Cytotoxic activity against the ovarian cancer cell line OVCAR5 with an IC <sub>50</sub> value of 9.0 µM.                                                                       | [44] |
| 140 | Diazaquinomycin F |                          |                                          |                                                                                                                                   | -                                                                                                                                                                              |      |
| 141 | Diazaquinomycin G |                          |                                          |                                                                                                                                   | -                                                                                                                                                                              |      |
| 142 | Ageloline A       | Quinoline                | <i>Streptomyces</i> sp.<br>SBT345        | Mediterranean sponge <i>Agelas oroides</i>                                                                                        | Inhibition of <i>Chlamydia trachomatis</i> growth with an IC <sub>50</sub> value of 9.54 ± 0.36 µM by inhibiting reactive ROS production during the early stages of infection. | [45] |
| 143 | Mansouramycin E   | Isoquinolinequinone      | <i>Streptomyces</i> sp.<br>B1848         | The Actinomycetes culture collection of the Alfred-Wegner Institute for Polar- und Marine Research, Am Handelshafen, Bremen,      | Cytotoxic activity against 36 cancer cell lines with mean IC <sub>50</sub> values of 23.10 µM.                                                                                 | [46] |
| 144 | Mansouramycin F   |                          |                                          |                                                                                                                                   | Cytotoxic activity against 36 cancer cell lines with mean IC <sub>50</sub> values of 7.92 µM.                                                                                  |      |

|     |                      |                        |                                         |                                                                                                                                   |                                                                                                                                                                                                                                                          |      |
|-----|----------------------|------------------------|-----------------------------------------|-----------------------------------------------------------------------------------------------------------------------------------|----------------------------------------------------------------------------------------------------------------------------------------------------------------------------------------------------------------------------------------------------------|------|
| 145 | Mansouramycin G      |                        |                                         | Germany                                                                                                                           | -                                                                                                                                                                                                                                                        |      |
| 146 | Strepchazolin A      | Miscellaneous pyridine | <i>Streptomyces chartreusis</i> NA02069 | A sediment from the coast of Hainan Island, China.                                                                                | Antimicrobial activity against <i>B. subtilis</i> with a MIC value of 64.0 $\mu$ M.<br>Enzyme inhibition against AChE with an IC <sub>50</sub> value of 50.6 $\mu$ M.                                                                                    | [47] |
| 147 | Strepchazolin B      |                        |                                         |                                                                                                                                   | -                                                                                                                                                                                                                                                        |      |
| 148 | Streptoglutarimide A | Miscellaneous pyridine | <i>Streptomyces</i> sp. ZZ741           | A sample (HQ-2) of marine mud collected from the coastal area of Jintang Island (30°06'39" N and 121°48'07" E) in Zhoushan, China | Antimicrobial activity against MRSA, <i>E. coli</i> and <i>C. albicans</i> with MIC values of 9, 9 and 16 $\mu$ M, respectively.                                                                                                                         | [48] |
| 149 | Streptoglutarimide B |                        |                                         |                                                                                                                                   | Antimicrobial activity against MRSA, <i>E. coli</i> and <i>C. albicans</i> with MIC values of 11, 9 and 20 $\mu$ M, respectively.                                                                                                                        |      |
| 150 | Streptoglutarimide C |                        |                                         |                                                                                                                                   | Antimicrobial activity against MRSA, <i>E. coli</i> and <i>C. albicans</i> with MIC values of 10, 8 and 15 $\mu$ M, respectively.                                                                                                                        |      |
| 151 | Streptoglutarimide D |                        |                                         |                                                                                                                                   | Antimicrobial activity against MRSA, <i>E. coli</i> and <i>C. albicans</i> with MIC values of 10, 8 and 8 $\mu$ M, respectively.                                                                                                                         |      |
| 152 | Streptoglutarimide E |                        |                                         |                                                                                                                                   | Antimicrobial activity against MRSA, <i>E. coli</i> and <i>C. albicans</i> with MIC values of 9, 10 and 20 $\mu$ M, respectively.                                                                                                                        |      |
| 153 | Streptoglutarimide F |                        |                                         |                                                                                                                                   | Antimicrobial activity against MRSA, <i>E. coli</i> and <i>C. albicans</i> with MIC values of 10, 12 and 18 $\mu$ M, respectively.                                                                                                                       |      |
| 154 | Streptoglutarimide G |                        |                                         |                                                                                                                                   | Antimicrobial activity against MRSA, <i>E. coli</i> and <i>C. albicans</i> with MIC values of 10, 12 and 18 $\mu$ M, respectively.                                                                                                                       |      |
| 155 | Streptoglutarimide H |                        |                                         |                                                                                                                                   | Antimicrobial activity against MRSA, <i>E. coli</i> and <i>C. albicans</i> with MIC values of 9, 10 and 15 $\mu$ M, respectively.<br>Cytotoxic activity against human glioma U87MG and U251 cell lines with IC <sub>50</sub> values of 3.8 $\pm$ 0.6 and |      |

|     |                                                                  |            |                                                           |                                                                                      |                                                                                                                               |      |
|-----|------------------------------------------------------------------|------------|-----------------------------------------------------------|--------------------------------------------------------------------------------------|-------------------------------------------------------------------------------------------------------------------------------|------|
|     |                                                                  |            |                                                           |                                                                                      | 1.5 ± 0.1 µM, respectively.                                                                                                   |      |
| 156 | Streptoglutarimide I                                             |            |                                                           |                                                                                      | Antimicrobial activity against MRSA, <i>E. coli</i> and <i>C. albicans</i> with MIC values of 11, 9 and 12 µM, respectively.  |      |
| 157 | Streptoglutarimide J                                             |            |                                                           |                                                                                      | Antimicrobial activity against MRSA, <i>E. coli</i> and <i>C. albicans</i> with MIC values of 10, 10 and 18 µM, respectively. |      |
| 158 | Griseusrazin A                                                   | Pyrazine   | <i>Streptomyces griseus</i> subsp. <i>griseus</i> 09-0144 | Tidal flat sediments on Hwangdo in the Yellow Sea, South Korea                       | Dose-dependently inhibition the production of NO and PGE <sub>2</sub> and the iNOS and COX-2 protein expression.              | [49] |
| 159 | (S)-6-( <i>sec</i> -butyl)-3-isopropylpyrazin-2(1 <i>H</i> )-one |            |                                                           |                                                                                      | Cytotoxic activity against HCT-116 and MCF-7 cell lines with IC <sub>50</sub> values of 30 and 25 µM, respectively.           |      |
| 160 | (S)-6-( <i>sec</i> -butyl)-6-isopropylpyrazin-2(1 <i>H</i> )-one | Pyrazinone | <i>Streptomyces</i> sp. Did-27                            | The marine tunicate <i>Didemnum</i> sp. in Obhur, Saudi Arabia                       | -                                                                                                                             | [50] |
| 161 | (S)-6-( <i>sec</i> -butyl)-3--isobutylpyrazin-2(1 <i>H</i> )-one |            |                                                           |                                                                                      | Cytotoxic activity against HCT-116 and MCF-7 cell lines with IC <sub>50</sub> values of 30 and 35 µM, respectively.           |      |
| 162 | Streptopyrazinone A                                              |            |                                                           |                                                                                      | Antimicrobial activity against MRSA and <i>C. albicans</i> with MIC values of 58.0 and 35.0 µM, respectively.                 |      |
| 163 | Streptopyrazinone B                                              | Pyrazinone | <i>Streptomyces</i> sp. ZZ446                             | A sample of coastal soil, which was collected from Zhoushan Islands, Zhejiang, China | Antimicrobial activity against MRSA and <i>C. albicans</i> with MIC values of 60.0 and 38.0 µM, respectively.                 | [51] |
| 164 | Streptopyrazinone C                                              |            |                                                           |                                                                                      | Antimicrobial activity against MRSA and <i>C. albicans</i> with MIC values of 62.0 and 45.0 µM, respectively.                 |      |
| 165 | Streptopyrazinone D                                              |            |                                                           |                                                                                      | Antimicrobial activity against MRSA and <i>C. albicans</i> with MIC values of 65.0 and 38.0 µM, respectively.                 |      |
| 166 | Actinopolymorphol E                                              | Pyrazine   | <i>Streptomyces</i> sp.                                   | The marine sediment                                                                  | -                                                                                                                             | [52] |

|     |                                                                |                      |                                   |                                                                                                                    |                                                                                                                                    |      |
|-----|----------------------------------------------------------------|----------------------|-----------------------------------|--------------------------------------------------------------------------------------------------------------------|------------------------------------------------------------------------------------------------------------------------------------|------|
| 167 | Actinopolymorphol F                                            |                      | CNP-944                           | collected at the La Jolla Submarine Canyon, California                                                             | Antimicrobial activity against <i>K. rhizophila</i> , <i>B. subtilis</i> and <i>S. aureus</i> with MIC values of 16-64 µg/mL.      |      |
| 168 | 3-(3-hydroxy-4-methoxybenzyl)-6isobutyl-2,5-diketopiperazine   | 2,5-diketopiperazine | <i>Streptomyces</i> sp. MNU FJ-36 | The intestinal fabric of <i>Katsuwonus</i> sp.                                                                     | Cytotoxic activity against A-549 cell line with an IC <sub>50</sub> value of 89.4 ± 5 µg/mL.                                       | [53] |
| 169 | 3-(1,3-benzodioxol-5-ylmethyl)-6isobutyl-2,5-diketopiperazine  |                      |                                   |                                                                                                                    | Cytotoxic activity against HCT-116 and A-549 cell lines with IC <sub>50</sub> values of 75.4 ± 4 and 35.4 ± 7 µg/mL, respectively. |      |
| 170 | 3-(1,3-benzodioxol-5-ylmethyl)6-isopropyl-2,5-diketopiperazine |                      |                                   |                                                                                                                    | Cytotoxic activity against HCT-116 and A-549 cell lines with IC <sub>50</sub> values of 45.4 ± 6 and 28.4 ± 5 µg/mL, respectively. |      |
| 171 | Streptodiketopiperazine A                                      | 2,5-diketopiperazine | <i>Streptomyces</i> sp. SY1965    | Hadal sediments MTD11000, which was collected from the Mariana Trench (11°20' N and 142°11.5' E) at depth 11,000 m | Antimicrobial activity against <i>C. albicans</i> with a MIC value of 42 µg/mL.                                                    | [54] |
| 172 | Streptodiketopiperazine B                                      |                      |                                   |                                                                                                                    | Antimicrobial activity against <i>C. albicans</i> with a MIC value of 42 µg/mL.                                                    |      |
| 173 | Naseseazine C                                                  | 2,5-diketopiperazine | <i>Streptomyces</i> sp. USC-636   | Marine sediment obtained on the Sunshine Coast, QLD, Australia                                                     | Inhibition of chloroquine-sensitive <i>Plasmodium falciparum</i> with an IC <sub>50</sub> value of 3.52 ± 1.2 µM.                  | [55] |
| 174 | Actinozine A                                                   | 2,5-diketopiperazine | <i>Streptomyces</i> sp. Call-36   | The Red Sea sponge <i>Callyspongia</i> species                                                                     | Antimicrobial activity against <i>S. aureus</i> and <i>C. albicans</i> with inhibition zones of 23.0 and 19.0 mm, respectively.    | [56] |
| 175 | Cyclo(2-OH-D-Pro-L-Leu)                                        |                      |                                   |                                                                                                                    | Antimicrobial activity against <i>S. aureus</i> and <i>C. albicans</i> with inhibition zones of 20.0 and 16.0 mm, respectively.    |      |
| 176 | Maculosin- <i>O</i> -α-L-rhamnopyranoside                      | 2,5-diketopiperazine | <i>Streptomyces</i> sp. ZZ446     | Coastal soil                                                                                                       | Antimicrobial activity against MRSA, <i>E. coli</i> and <i>C. albicans</i> with MIC values of 26.0-37.0 µg/mL.                     | [57] |
| 177 | Maculosin                                                      |                      |                                   |                                                                                                                    | Antimicrobial activity against MRSA, <i>E. coli</i> and <i>C. albicans</i> with MIC values of 27.0-37.0 µg/mL.                     |      |
| 178 | Venezueline A                                                  | Phenoxazine          | <i>Streptomyces</i>               | The ocean sediment near                                                                                            | -                                                                                                                                  | [58] |



|     |                    |             |                                |                                                                                                                     |                                                                                                                                                                                                                                                      |      |
|-----|--------------------|-------------|--------------------------------|---------------------------------------------------------------------------------------------------------------------|------------------------------------------------------------------------------------------------------------------------------------------------------------------------------------------------------------------------------------------------------|------|
| 179 | Venezueline B      |             | <i>venezuelae</i> KHG20-22     | Guam Island (Pacific Ocean)                                                                                         | Cytotoxic activity against five cancer cell lines HCT-8, BGC-823, A549, A2780 and NIH-H460 with IC <sub>50</sub> values of 5.74-9.67 µM.                                                                                                             |      |
| 180 | Venezueline C      |             |                                |                                                                                                                     | -                                                                                                                                                                                                                                                    |      |
| 181 | Venezueline D      |             |                                |                                                                                                                     | -                                                                                                                                                                                                                                                    |      |
| 182 | Venezueline E      |             |                                |                                                                                                                     | -                                                                                                                                                                                                                                                    |      |
| 183 | Maroxazinone       | Phenoxazine | <i>Streptomyces</i> sp. Eg25   | A sea sand sample collected from Marsa Matruh city (Egypt)                                                          | Cytotoxic activity against three cancer cell lines MCF-7, HEPG-2 and HCT-116 with IC <sub>50</sub> values of 4.32, 2.90 and 8.51 µg/mL, respectively.                                                                                                | [59] |
| 184 | Streptophenazine I | phenazine   | <i>Streptomyces</i> sp. HB202  | The marine breadcrumb sponge <i>Halichondria panicea</i> (class Demospongia) collected from the Baltic Sea, Germany | Enzyme inhibition against enzyme phosphodiesterase with an IC <sub>50</sub> value of 11.6 ± 1.1 µM.                                                                                                                                                  | [60] |
| 185 | Streptophenazine J |             |                                |                                                                                                                     | Enzyme inhibition against enzyme phosphodiesterase with an IC <sub>50</sub> value of 2.0 ± 0.9 µM.                                                                                                                                                   |      |
| 186 | Streptophenazine K |             |                                |                                                                                                                     | Enzyme inhibition against enzyme phosphodiesterase with an IC <sub>50</sub> value of 12.2 ± 2.0 µM.<br>Antimicrobial activity against <i>B. subtilis</i> and <i>S. epidermidis</i> with MIC values of 21.6 ± 6.8 µM and 14.5 ± 2.0 µM, respectively. |      |
| 187 | Strepoxazine A     | phenoxazine | <i>Streptomyces</i> sp. SBT345 | The Mediterranean sponge <i>Agelas oroides</i>                                                                      | Cytotoxic activity against human promyelocytic leukemia cells HL-60 with an IC <sub>50</sub> value of 16 µg/mL.                                                                                                                                      | [61] |
| 188 | Neo-actinomycin A  | phenoxazine | <i>Streptomyces</i> sp. IMB094 | A marine sediment sample collected at a depth of ca. 40 m from Heishijiao Bay, Dalian, China                        | Antimicrobial activity against MRSA and VRE with MIC values of 16-64 µg/mL.<br>Cytotoxic activity against HCT-116 and A549 cancer cell lines with IC <sub>50</sub> values of 38.7 nM and 65.8 nM, respectively.                                      | [62] |
| 189 | Neo-actinomycin B  |             |                                |                                                                                                                     | -                                                                                                                                                                                                                                                    |      |

|     |                   |                            |                               |                                                                                         |                                                                                                                                                                                                                                                                                                  |      |
|-----|-------------------|----------------------------|-------------------------------|-----------------------------------------------------------------------------------------|--------------------------------------------------------------------------------------------------------------------------------------------------------------------------------------------------------------------------------------------------------------------------------------------------|------|
| 191 | Actinomycin S     | phenoxazine                | <i>Streptomyces</i> sp. S22   | A sediment sample collected from a saline-alkali land in the Huanghe River delta, China | Antimicrobial activity against pathogenic bacteria <i>E. faecium</i> , <i>S. aureus</i> , <i>K. pneumoniae</i> , <i>A. baumannii</i> and <i>E. coli</i> with all MIC values of 5 µg/mL.<br>Cytotoxic activity against HepG2 liver carcinoma cell line with an IC <sub>50</sub> value of 0.10 µM. | [63] |
| 192 | Neo-actinomycin C |                            |                               |                                                                                         | Antimicrobial activity against <i>E. faecium</i> , <i>S. aureus</i> , <i>K. pneumoniae</i> , <i>A. baumannii</i> and <i>E. coli</i> with MIC values of 10-80 µg/mL.<br>Cytotoxic activity against HepG2 liver carcinoma cell line with an IC <sub>50</sub> value of 0.32 µM.                     |      |
| 193 | Neo-actinomycin D |                            |                               |                                                                                         | Antimicrobial activity against <i>E. faecium</i> , <i>S. aureus</i> , <i>K. pneumoniae</i> , <i>A. baumannii</i> and <i>E. coli</i> with MIC values of 2.5-5 µg/mL.<br>Cytotoxic activity against HepG2 liver carcinoma cell line with an IC <sub>50</sub> value of 0.024 µM.                    |      |
| 194 | Cyclizidine B     | Cyclizidine (Indolizidine) | <i>Streptomyces</i> sp. HNA39 | Marine sediments of Hainan Island (Hainan province, China, N 19° 95' E 110° 58')        | -                                                                                                                                                                                                                                                                                                | [64] |
| 195 | Cyclizidine C     |                            |                               |                                                                                         | Cytotoxic activity against PC-3 and HCT-116 cancer cell lines with IC <sub>50</sub> values of 0.52 ± 0.03 µM and 8.3 ± 0.1 µM, respectively.<br>Enzyme inhibition against protein kinase ROCK2 with an IC <sub>50</sub> value of 7.0 ± 0.8 µM.                                                   |      |
| 196 | Cyclizidine D     |                            |                               |                                                                                         | Cytotoxic activity against PC-3 and HCT-116 cancer cell lines with IC <sub>50</sub> values of 33 ± 1 µM and 40 ± 1 µM, respectively.                                                                                                                                                             |      |
| 197 | Cyclizidine E     |                            |                               |                                                                                         | -                                                                                                                                                                                                                                                                                                |      |
| 198 | Cyclizidine F     |                            |                               |                                                                                         | Enzyme inhibition against protein kinase ROCK2 with an IC <sub>50</sub> value of 27 ± 1 µM.                                                                                                                                                                                                      |      |
| 199 | Cyclizidine G     |                            |                               |                                                                                         | -                                                                                                                                                                                                                                                                                                |      |
| 200 | Cyclizidine H     |                            |                               |                                                                                         | Cytotoxic activity against PC-3 cancer cell line with an IC <sub>50</sub> value of 17 ± 1 µM.<br>Enzyme inhibition against protein kinase ROCK2                                                                                                                                                  |      |

|     |                     |                            |                                             |                                                                                                                                                                          |                                                                                             |      |
|-----|---------------------|----------------------------|---------------------------------------------|--------------------------------------------------------------------------------------------------------------------------------------------------------------------------|---------------------------------------------------------------------------------------------|------|
|     |                     |                            |                                             |                                                                                                                                                                          | with an IC <sub>50</sub> value of 42 ± 3 µM.                                                |      |
| 201 | Cyclizidine I       |                            |                                             |                                                                                                                                                                          | Enzyme inhibition against protein kinase ROCK2 with an IC <sub>50</sub> value of 39 ± 1 µM. |      |
| 202 | Cyclizidine J       | Cyclizidine (Indolizidine) | <i>Streptomyces</i> sp. HNA39               | Marine sediments of Hainan Island (Hainan province, China, N 19° 95' E 110° 58')                                                                                         | -                                                                                           | [65] |
| 203 | Unnamed             | Cyclizidine (piperidine)   | <i>Streptomyces</i> sp. WU20                | Hydrothermal vent sediment, collected from Kueishantao, Taiwan.                                                                                                          | Antimicrobial activity against <i>B. subtilis</i> with a MIC value of around 32 µg/mL.      | [66] |
| 204 | Streptopertusacin A | Indolizinium               | <i>Streptomyces</i> sp. HZP-2216E           | The fresh sea lettuce <i>Ulva pertusa</i> collected from the Turtle Islet located at 22.46° N and 115.21 ° E in South China Sea close to Shanwei City (Guangdong, China) | Antimicrobial activity against MRSA with a MIC value of 40 mg/mL.                           | [67] |
| 205 | Spithioneine A      | Pyrrolizidine              | <i>Streptomyces spinoverrucosus</i> SNB-048 | A sand sample collected from a Bahamian tidal flat                                                                                                                       | -                                                                                           | [68] |
| 206 | Spithioneine B      |                            |                                             |                                                                                                                                                                          | -                                                                                           |      |
| 207 | Bohemamine D        | Pyrrolizidine              | <i>Streptomyces spinoverrucosus</i> SNB-048 | A sand sample collected from a Bahamian tidal flat                                                                                                                       | -                                                                                           | [69] |
| 208 | Bohemamine E        |                            |                                             |                                                                                                                                                                          | -                                                                                           |      |
| 209 | Bohemamine F        |                            |                                             |                                                                                                                                                                          | -                                                                                           |      |
| 210 | Bohemamine G        |                            |                                             |                                                                                                                                                                          | -                                                                                           |      |
| 211 | Bohemamine H        |                            |                                             |                                                                                                                                                                          | -                                                                                           |      |
| 212 | Bohemamine I        |                            |                                             |                                                                                                                                                                          | -                                                                                           |      |
| 213 | 5-Br-bohemamine C   | Pyrrolizidine              | <i>Streptomyces</i>                         | A sediment sample collected                                                                                                                                              | -                                                                                           | [70] |

|     |                |              |                                         |                                                                                                    |                                                                                                                                                                                                             |      |
|-----|----------------|--------------|-----------------------------------------|----------------------------------------------------------------------------------------------------|-------------------------------------------------------------------------------------------------------------------------------------------------------------------------------------------------------------|------|
| 214 | Dibohemamine A |              | <i>spinoverrucosus</i><br>SNB-032       | from amudflat on a small<br>Bahamas island                                                         | -                                                                                                                                                                                                           |      |
| 215 | Dibohemamine B |              |                                         |                                                                                                    | Cytotoxic activity against NSCLC cell lines A549 and HCC1171 with IC <sub>50</sub> values of 0.140 and 3.9 $\mu$ M, respectively.                                                                           |      |
| 216 | Dibohemamine C |              |                                         |                                                                                                    | Cytotoxic activity against NSCLC cell lines A549, HCC44, HCC1171 and HCC366 with IC <sub>50</sub> values of 0.145-12.0 $\mu$ M.                                                                             |      |
| 217 | Carpatamide A  | Linear amide | <i>Streptomyces</i> sp.<br>SNE-011      | A marine sediment sample collected from South Carolina (32°35'10" N, 80°07'31" W)                  | Cytotoxic activity against three cancer cell lines HCC366, A549 and HCC44 with IC <sub>50</sub> values of 2.8-8.4 $\mu$ M.                                                                                  | [71] |
| 218 | Carpatamide B  |              |                                         |                                                                                                    | -                                                                                                                                                                                                           |      |
| 219 | Carpatamide C  |              |                                         |                                                                                                    | Cytotoxic activity against three cancer cell lines HCC366 and A549 with IC <sub>50</sub> values of 2.2 and 3.7 $\mu$ M, respectively.                                                                       |      |
| 220 | Antimycin E    | Linear amide | <i>Streptomyces</i> sp.<br>THS-55       | The sediment of mangrove, Sanya, China                                                             | Significant cytotoxic activity against HeLa cell line with IC <sub>50</sub> < 0.1 $\mu$ M.                                                                                                                  | [72] |
| 221 | Antimycin F    |              |                                         |                                                                                                    |                                                                                                                                                                                                             |      |
| 222 | Antimycin G    |              |                                         |                                                                                                    |                                                                                                                                                                                                             |      |
| 223 | Antimycin H    |              |                                         |                                                                                                    |                                                                                                                                                                                                             |      |
| 224 | Neoantimycin A | Linear amide | <i>Streptomyces antibioticus</i> H12-15 | A marine sediment sample collected at the Taishan mangrove site, Guangdong province, China         | Cytotoxic activity against SF-268 cell line with an IC <sub>50</sub> value of 33.6 $\mu$ M.                                                                                                                 | [73] |
| 225 | Neoantimycin B |              |                                         |                                                                                                    | Cytotoxic activity against SF-268 cell line with an IC <sub>50</sub> value of 41.6 $\mu$ M.                                                                                                                 |      |
| 226 | Bagremycin C   | Linear amide | <i>Streptomyces</i> sp. Q22             | A sample of mangrove soils obtained from the Qiao Mangrove Forest in Zhuhai City, Guangdong, China | Cytotoxic activity against four cancer cell lines U87MG, U251, SHG44, and C6 with IC <sub>50</sub> values of 2.2 $\pm$ 0.1-6.4 $\pm$ 0.5 $\mu$ M. (inhibited the G <sub>0</sub> /G <sub>1</sub> cell cycle) | [74] |
| 227 | Bagremycin D   |              |                                         |                                                                                                    | -                                                                                                                                                                                                           |      |
| 228 | Bagremycin F   | Linear amide | <i>Streptomyces</i> sp.<br>ZZ745        | A sample of marine mud collected from a coastal area                                               | Antimicrobial activity against <i>E. coli</i> with a MIC value of 41.8 $\mu$ g/mL.                                                                                                                          | [75] |

|     |                                         |                                   |                                             |                                                                                     |                                                                                                                                                                   |      |
|-----|-----------------------------------------|-----------------------------------|---------------------------------------------|-------------------------------------------------------------------------------------|-------------------------------------------------------------------------------------------------------------------------------------------------------------------|------|
| 229 | Bagremycin G                            |                                   |                                             | located at the Jintang Island of Zhoushan, Zhejiang, China                          | Antimicrobial activity against <i>E. coli</i> with a MIC value of 67.1 µg/mL.                                                                                     |      |
| 230 | <i>N</i> -acetylborrelidin B            | Linear amide                      | <i>Streptomyces mutabilis</i> sp. MII       | A sediment sample collected from Hurghada Coast at the Red Sea, Egypt               | Antimicrobial activity against <i>E. coli</i> , <i>B. subtilis</i> , <i>P. agarici</i> , <i>M. luteus</i> and <i>S. warneri</i> with inhibition zones of 7-18 mm. | [76] |
| 231 | Isoikarugamycin                         | Polycyclic tetramate macrolactams | <i>Streptomyces zhaozhouensis</i> CA-185989 | A marine sediment collected off-shore at 2 m depth nearby Utonde, Equatorial Guinea | Antimicrobial activity against MRSA, <i>C. albicans</i> and <i>A. fumigatus</i> with MIC values of 2-8 µg/mL.                                                     | [77] |
| 232 | 28- <i>N</i> -methylikaguramycin        |                                   |                                             |                                                                                     | Antimicrobial activity against MRSA, <i>C. albicans</i> and <i>A. fumigatu</i> with MIC values of 1-8 µg/mL.                                                      |      |
| 233 | 30-oxo-28- <i>N</i> -methylikarugamycin |                                   |                                             |                                                                                     | Antimicrobial activity against MRSA with MIC values of 32-64 µg/mL.                                                                                               |      |
| 234 | Pactamide A                             | Polycyclic tetramate macrolactams | <i>Streptomyces pactum</i> SCSIO 02999      | Deep-sea derived                                                                    | Cytotoxic activity against cancer cell lines SF-268, MCF-7, NCI-H460 and HepG2 with IC <sub>50</sub> values of 0.24 ± 0.02-0.51 ± 0.01 µM.                        | [78] |
| 235 | Pactamide B                             |                                   |                                             |                                                                                     | Cytotoxic activity against cancer cell lines SF-268, MCF-7, NCI-H460 and HepG2 with IC <sub>50</sub> values of 21.93 ± 0.58-26.15 ± 1.37 µM.                      |      |
| 236 | Pactamide C                             |                                   |                                             |                                                                                     | Cytotoxic activity against SF-268, MCF-7, NCI-H460 and HepG2 with IC <sub>50</sub> values of 0.71 ± 0.02-2.42 ± 0.15 µM.                                          |      |
| 237 | Pactamide D                             |                                   |                                             |                                                                                     | Cytotoxic activity against SF-268, MCF-7, NCI-H460 and HepG2 with IC <sub>50</sub> values of 14.50 ± 0.02-2.42 ± 0.15 µM.                                         |      |
| 238 | Pactamide E                             |                                   |                                             |                                                                                     | Cytotoxic activity against SF-268, MCF-7, NCI-H460 and HepG2 with IC <sub>50</sub> values of 5.10 ± 1.43-8.70 ± 0.25 µM.                                          |      |
| 239 | Pactamide F                             |                                   |                                             |                                                                                     | Cytotoxic activity against SF-268, MCF-7, NCI-H460 and HepG2 with IC <sub>50</sub> values of 2.65 ± 0.29-2.85 ± 0.22 µM.                                          |      |
| 240 | Chlokamycin                             | Polycyclic tetramate macrolactams | <i>Streptomyces</i> sp. MA2-12              | The Marine Biosciences Kamaishi Research laboratory                                 | Cytotoxic activity against Jurkat and HCT116 cell lines with IC <sub>50</sub> values of 24.7 µM and 33.5 µM, respectively.                                        | [79] |

|     |                                    |                                   |                                      |                                                         |                                                                                                                                                                  |      |
|-----|------------------------------------|-----------------------------------|--------------------------------------|---------------------------------------------------------|------------------------------------------------------------------------------------------------------------------------------------------------------------------|------|
| 241 | 10- <i>epi</i> -HSAF               | Polycyclic tetramate macrolactams | <i>Streptomyces</i> sp. SCSIO 40010  | The Mangrove sediment obtained from Penang, Malaysia    | Cytotoxic activity against SF-268, MCF-7, A549 and HepG2 with IC <sub>50</sub> values of 2.47 ± 0.05-5.99 ± 0.15 µM.                                             | [80] |
| 242 | 10- <i>epi</i> -deOH-HSAF          |                                   |                                      |                                                         | Cytotoxic activity against SF-268, MCF-7, A549 and HepG2 with IC <sub>50</sub> values of 3.84 ± 0.07-11.01 ± 1.09 µM.                                            |      |
| 243 | 10- <i>epi</i> -maltophilin        |                                   |                                      |                                                         | Cytotoxic activity against SF-268, MCF-7, A549 and HepG2 with IC <sub>50</sub> values of 3.18 ± 0.13-6.30 ± 0.34 µM.                                             |      |
| 244 | 10- <i>epi</i> -xanthobaccin C     |                                   |                                      |                                                         | Cytotoxic activity against SF-268, MCF-7, A549 and HepG2 with IC <sub>50</sub> values of 3.54 ± 0.24-17.86 ± 0.62 µM.                                            |      |
| 245 | 10- <i>epi</i> -hydroxymaltophilin |                                   |                                      |                                                         | Cytotoxic activity against SF-268, MCF-7, A549 and HepG2 with IC <sub>50</sub> values of 3.12 ± 0.11-6.83 ± 0.36 µM.                                             |      |
| 246 | 10- <i>epi</i> -FI-2               |                                   |                                      |                                                         | -                                                                                                                                                                |      |
| 247 | JBIR-150                           | Macrolactam                       | <i>Streptomyces</i> sp. OPMA00071    | Marine sediments collected in Okinawa prefecture, Japan | Cytotoxic activity against Jurkat and MESO-1 cell lines with IC <sub>50</sub> values of 0.9 µM and 2.3 µM, respectively.                                         | [81] |
| 248 | Muanlactam                         | Macrolactam                       | <i>Streptomyces</i> sp. MA159        | Intertidal mudflats                                     | Cytotoxic activity against HCT-116 cell line with an IC <sub>50</sub> value of 1.58 µM.                                                                          | [82] |
| 249 | Cyclamenol E                       | Macrolactam                       | <i>Streptomyces</i> sp. OUCMDZ-4348  | Antarctica                                              | Cytotoxic activity against the gastric carcinoma cell line N87 with an IC <sub>50</sub> value of 9.8 µM.                                                         | [83] |
| 250 | Cyclamenol F                       |                                   |                                      |                                                         | -                                                                                                                                                                |      |
| 251 | Somalactam A                       | Macrolactam                       | <i>Streptomyces somaliensis</i> 1107 | An Arctic <i>Haliclona</i> sponge                       | Inhibition of IL-6 and TNF-α release in the serum of LPS-stimulated RAW264.7 macrophage cells with IC <sub>50</sub> values of 5.76 µM and 0.18 µM, respectively. | [84] |
| 252 | Somalactam B                       |                                   |                                      |                                                         | -                                                                                                                                                                |      |
| 253 | Somalactam C                       |                                   |                                      |                                                         | -                                                                                                                                                                |      |

|     |                        |                             |                                        |                                                                                                               |                                                                                                                                                                                                                                                                                                                                                                                                                                   |      |
|-----|------------------------|-----------------------------|----------------------------------------|---------------------------------------------------------------------------------------------------------------|-----------------------------------------------------------------------------------------------------------------------------------------------------------------------------------------------------------------------------------------------------------------------------------------------------------------------------------------------------------------------------------------------------------------------------------|------|
| 254 | Somalactam D           |                             |                                        |                                                                                                               | -                                                                                                                                                                                                                                                                                                                                                                                                                                 |      |
| 255 | Niphimycin C           | Guanidylpolyol<br>macrolide | <i>Streptomyces</i> sp.<br>IMB7-145    | A marine sediment sample<br>collected at a depth of ca. 40<br>m from Heishijiao Bay,<br>Dalian, China         | Antimicrobial activity against Gram-positive<br>bacteria <i>S. epidermidis</i> , <i>S. aureus</i> , <i>E. faecalis</i> , <i>E.</i><br><i>faecium</i> and fungi <i>C. albicans</i> with MIC values of 8-<br>64 µg/mL and <i>Mycobacterium tuberculosis</i> strains<br>with MIC values of 4-32 µg/mL.<br>Cytotoxic activity against cancer cell lines K562,<br>HepG2, MCF-7 and HeLa with IC <sub>50</sub> values of 8.5-<br>24 µM. | [85] |
| 256 | Niphimycin D           |                             |                                        |                                                                                                               | Antimicrobial activity against <i>S. aureu</i> and fungi<br><i>C. albicans</i> with both MIC values of 64 µg/mL.<br>Cytotoxic activity against HeLa cancer cell line<br>with an IC <sub>50</sub> value of 22.4 µM.                                                                                                                                                                                                                |      |
| 257 | Niphimycin E           |                             |                                        |                                                                                                               | Antimicrobial activity against <i>S. epidermidis</i> , <i>S.</i><br><i>aureu</i> and fungi <i>C. albicans</i> with MIC values of 16-<br>32 µg/mL.<br>Cytotoxic activity against cancer cell lines K562,<br>HepG2, MCF-7 and HeLa with IC <sub>50</sub> values of 9-<br>20.8 µM.                                                                                                                                                   |      |
| 258 | 17-O-methyl-niphimycin |                             |                                        |                                                                                                               | Antimicrobial activity against Gram-positive<br>bacteria <i>S. epidermidis</i> , <i>S. aureus</i> , <i>E. faecalis</i> , <i>E.</i><br><i>faecium</i> and <i>C. albicans</i> with MIC values of 8-64<br>µg/mL.<br>Cytotoxic activity against cancer cell lines K562,<br>HepG2, MCF-7 and HeLa with IC <sub>50</sub> values of 3-<br>16.2 µM.                                                                                       |      |
| 259 | Antartin               | Sesquiterpene               | <i>Streptomyces</i> sp.<br>SCO736      | Marine sediments collected<br>off the coast of Antarctica                                                     | Cytotoxic activity against twelve human cancer<br>cells with GI <sub>50</sub> of 4-8 µg/mL and inhibited the<br>production of solid lung tumor cells.                                                                                                                                                                                                                                                                             | [86] |
| 260 | Penzonemycin A         | phenylhydrazone             | <i>Streptomyces</i> sp.<br>SCSIO 40020 | A marine sediment sample<br>(E 114.0432°, N 22.0194°,<br>Pearl River Estuary in China<br>at the depth of 28 m | Cytotoxic activity against cancer cell lines SF-268,<br>MCF-7, A549 and HepG-2 with IC <sub>50</sub> values of<br>30.44-61.92 µM.                                                                                                                                                                                                                                                                                                 | [87] |
| 261 | Penzonemycin B         |                             |                                        |                                                                                                               | -                                                                                                                                                                                                                                                                                                                                                                                                                                 |      |

## References

1. Cheng, X.; Zhou, B.; Liu, H.; Huo, C.; Ding, W. One new indolocarbazole alkaloid from the *Streptomyces* sp. A22. *Nat. Prod. Res.* **2018**, *32*, (21), 2583-2588.
2. Wang, J. N.; Zhang, H. J.; Li, J. Q.; Ding, W. J.; Ma, Z. J. Bioactive indolocarbazoles from the marine-derived *Streptomyces* sp. DT-A61. *J. Nat. Prod.* **2018**, *81*, (4), 949-956.
3. Qin, L.; Zhou, B.; Ding, W.; Ma, Z. Bioactive metabolites from marine-derived *Streptomyces* sp. A68 and its Rifampicin resistant mutant strain R-M1. *Phytochem. Lett.* **2018**, *23*, 46-51.
4. Zhou, B.; Hu, Z. J.; Zhang, H. J.; Li, J. Q.; Ding, W. J.; Ma, Z. J. Bioactive staurosporine derivatives from the *Streptomyces* sp. NB-A13. *Bioorg. Chem.* **2019**, *82*, 33-40.
5. Zhou, B.; Qin, L.; Ding, W.; Ma, Z. Cytotoxic indolocarbazoles alkaloids from the *Streptomyces* sp. A65. *Tetrahedron* **2018**, *74*, (7), 726-730.
6. Wang, C.; Monger, A.; Wang, L.; Fu, P.; Piyachaturawat, P.; Chairoungdua, A.; Zhu, W. Precursor-directed generation of indolocarbazoles with topoisomerase II $\alpha$  inhibitory activity. *Mar. Drugs* **2018**, *16*, (5), 168.
7. Cui, T.; Lin, S.; Wang, Z.; Fu, P.; Wang, C.; Zhu, W. Cytotoxic indolocarbazoles from a marine-derived *Streptomyces* sp. OUCMDZ-5380. *Front. Microbiol.* **2022**, *13*, 957473.
8. Zhang, W.; Ma, L.; Li, S.; Liu, Z.; Chen, Y.; Zhang, H.; Zhang, G.; Zhang, Q.; Tian, X.; Yuan, C.; Zhang, S.; Zhang, W.; Zhang, C. Indimicins A–E, bisindole alkaloids from the deep-sea-derived *Streptomyces* sp. SCSIO 03032. *J. Nat. Prod.* **2014**, *77*, (8), 1887-1892.
9. Liu, Z.; Ma, L.; Zhang, L.; Zhang, W.; Zhu, Y.; Chen, Y.; Zhang, W.; Zhang, C. Functional characterization of the halogenase SpmH and discovery of new deschloro-tryptophan dimers. *Org. Biomol. Chem.* **2019**, *17*, (5), 1053-1057.
10. Paulus, C.; Rebets, Y.; Tokovenko, B.; Nadmid, S.; Terekhova, L. P.; Myronovskyi, M.; Zotchev, S. B.; Ruckert, C.; Braig, S.; Zahler, S.; Kalinowski, J.; Luzhetskyy, A. New natural products identified by combined genomics-metabolomics profiling of marine *Streptomyces* sp. MP131-18. *Sci. Rep.* **2017**, *7*, 42382.
11. Song, Y.; Yang, J.; Yu, J.; Li, J.; Yuan, J.; Wong, N. K.; Ju, J. Chlorinated bis-indole alkaloids from deep-sea derived *Streptomyces* sp. SCSIO 11791 with antibacterial and cytotoxic activities. *J. Antibiot. (Tokyo)* **2020**, *73*, (8), 542-547.
12. Kim, S. H.; Ha, T. K.; Oh, W. K.; Shin, J.; Oh, D. C. Antiviral indolosesquiterpenoid xiamycins C-E from a halophilic actinomycete. *J. Nat. Prod.* **2016**, *79*, (1), 51-8.



13. Park, J.; Cho, H. S.; Moon, D. H.; Lee, D.; Kal, Y.; Cha, S.; Lee, S. K.; Yoon, Y. J.; Oh, D.-C. Discovery of new indolosesquiterpenoids bearing a N-O linkage by overexpression of LuxR regulator in a marine bacterium *Streptomyces* sp. *Front. Mar. Sci.* **2023**, *10*, 1140516.
14. Zhang, S.; Yang, Q.; Guo, L.; Zhang, Y.; Feng, L.; Zhou, L.; Yang, S.; Yao, Q.; Pescitelli, G.; Xie, Z. Isolation, structure elucidation and racemization of (+)- and (-)-pratensilins A-C: unprecedented spiro indolinone-naphthofuran alkaloids from a marine *Streptomyces* sp. *Chem. Commun. (Camb.)* **2017**, *53*, (72), 10066-10069.
15. Guo, L.; Zhang, L.; Yang, Q.; Xu, B.; Fu, X.; Liu, M.; Li, Z.; Zhang, S.; Xie, Z. Antibacterial and cytotoxic bridged and ring cleavage angucyclinones from a marine *Streptomyces* sp. *Front. Chem.* **2020**, *8*, 586.
16. Che, Q.; Qiao, L.; Han, X.; Liu, Y.; Wang, W.; Gu, Q.; Zhu, T.; Li, D. Anthranosides A-C, anthranilate derivatives from a sponge-derived *Streptomyces* sp. CMN-62. *Org. Lett.* **2018**, *20*, (17), 5466-5469.
17. Newaz, A. W.; Yong, K.; Lian, X.; Zhang, Z. Streptoindoles A-D, novel antimicrobial indole alkaloids from the marine-associated actinomycete *Streptomyces* sp. ZZ1118. *Tetrahedron* **2022**, *104*, 132598.
18. Zhang, X.; Li, Z.; Du, L.; Chlipala, G. E.; Lopez, P. C.; Zhang, W.; Sherman, D. H.; Li, S. Identification of an unexpected shunt pathway product provides new insights into tirandamycin biosynthesis. *Tetrahedron Lett.* **2016**, *57*, (52), 5919-5923.
19. Cong, Z.; Huang, X.; Liu, Y.; Liu, Y.; Wang, P.; Liao, S.; Yang, B.; Zhou, X.; Huang, D.; Wang, J. Cytotoxic anthracycline and antibacterial tirandamycin analogues from a marine-derived *Streptomyces* sp. SCSIO 41399. *J. Antibiot. (Tokyo)* **2019**, *72*, (1), 45-49.
20. Song, F.; Hu, J.; Zhang, X.; Xu, W.; Yang, J.; Li, S.; Xu, X. Unique cyclized thiolopyrrolones from the marine-derived *Streptomyces* sp. BTBU20218885. *Mar. Drugs* **2022**, *20*, (3), 214.
21. Chung, B.; Hwang, J. Y.; Park, S. C.; Kwon, O. S.; Cho, E.; Lee, J.; Lee, H. S.; Oh, D. C.; Shin, J.; Oh, K. B. Inhibitory effects of nitrogenous metabolites from a marine-derived *Streptomyces bacillaris* on isocitrate lyase of *Candida albicans*. *Mar. Drugs* **2022**, *20*, (2), 138.
22. Kim, M. C.; Lee, J. H.; Shin, B.; Subedi, L.; Cha, J. W.; Park, J. S.; Oh, D. C.; Kim, S. Y.; Kwon, H. C. Salinazinones A and B: Pyrrolidinyloxazinones from solar saltern-derived *Streptomyces* sp. KMF-004. *Org. Lett.* **2015**, *17*, (20), 5024-7.
23. Zhang, Y. M.; Liu, B. L.; Zheng, X. H.; Huang, X. J.; Li, H. Y.; Zhang, Y.; Zhang, T. T.; Sun, D. Y.; Lin, B. R.; Zhou, G. X. Anandins A and B, two rare steroidal alkaloids from a marine *Streptomyces anandii* H41-59. *Mar. Drugs* **2017**, *15*, (11), 355.
24. Lim, H. J.; An, J. S.; Bae, E. S.; Cho, E.; Hwang, S.; Nam, S. J.; Oh, K. B.; Lee, S. K.; Oh, D. C. Ligiamycins A and B, decalin-amino-maleimides from the co-culture of *Streptomyces* sp. and *Achromobacter* sp. Isolated from the marine wharf roach, *Ligia exotica*. *Mar. Drugs* **2022**, *20*, (2), 83.
25. Han, Y.; Li, Y. Y.; Shen, Y.; Li, J.; Li, W. J.; Shen, Y. M. Oxoprothracarcin, a novel pyrrolo[1,4]benzodiazepine antibiotic from marine *Streptomyces* sp.

M10946. *Drug Discov. Ther.* **2013**, *7*, (6), 243-7.

26. Çetinel Aksoy, S.; Küçüksolak, M.; Uze, A.; Bedir, E. Benzodiazepine derivatives from marine-derived *Streptomyces cacaoi* 14CM034. *Rec. Nat. Prod.* **2021**, *15*, (6), 602-607.
27. Lu, C.; Li, Y.; Deng, J.; Li, S.; Shen, Y.; Wang, H.; Shen, Y. Hygrocins C-G, cytotoxic naphthoquinone ansamycins from gdmAI-disrupted *Streptomyces* sp. LZ35. *J. Nat. Prod.* **2013**, *76*, (12), 2175-9.
28. Li, S.; Lu, C.; Ou, J.; Deng, J.; Shen, Y. Overexpression of hgc1 increases the production and diversity of hygrocins in *Streptomyces* sp. LZ35. *RSC Adv.* **2015**, *5*, (102), 83843-83846.
29. Yi, W.; Newaz, A. W.; Yong, K.; Ma, M.; Lian, X. Y.; Zhang, Z. New Hygrocins K-U and streptophenylpropanamide A and bioactive compounds from the marine-associated *Streptomyces* sp. ZZ1956. *Antibiotics-Basel* **2022**, *11*, (11), 1455.
30. Le, T. C.; Yang, I.; Yoon, Y. J.; Nam, S. J.; Fenical, W. Ansalactams B-D illustrate further biosynthetic plasticity within the ansamycin pathway. *Org. Lett.* **2016**, *18*, (9), 2256-9.
31. Zhou, L. M.; Kong, F. D.; Xie, Q. Y.; Ma, Q. Y.; Hu, Z.; Zhao, Y. X.; Luo, D. Q. Divergolides T-W with apoptosis-inducing activity from the mangrove-derived actinomycete *Streptomyces* sp. KFD18. *Mar. Drugs* **2019**, *17*, (4), 219.
32. Alvarez-Mico, X.; Jensen, P. R.; Fenical, W.; Hughes, C. C. Chlorizidine, a cytotoxic 5H-pyrrolo[2,1-a]isoindol-5-one-containing alkaloid from a marine *Streptomyces* sp. *Org. Lett.* **2013**, *15*, (5), 988-991.
33. Heo, C. S.; Kang, J. S.; Kwon, J. H.; Anh, C. V.; Shin, H. J. Pyrrole-containing alkaloids from a marine-derived actinobacterium *Streptomyces zhaozhouensis* and their antimicrobial and cytotoxic activities. *Mar. Drugs* **2023**, *21*, (3), 167.
34. Lian, X. Y.; Zhang, Z. Indanomycin-related antibiotics from marine *Streptomyces antibioticus* PTZ0016. *Nat. Prod. Res.* **2013**, *27*, (23), 2161-7.
35. Zhou, B.; Huang, Y.; Zhang, H.; Li, J.; Ding, W. Nitricquinomycins A-C, uncommon naphthopyrrolediones from the *Streptomyces* sp. ZS-A45. *Tetrahedron* **2019**, *75*, (30), 3958-3961.
36. Song, F.; Yang, N.; Khalil, Z. G.; Salim, A. A.; Han, J.; Bernhardt, P. V.; Lin, R.; Xu, X.; Capon, R. J. Bhimamycin J, a rare benzo[*f*]isoindole-dione alkaloid from the marine-derived actinomycete *Streptomyces* sp. MS180069. *Chem. Biodivers.* **2021**, *18*, (11), e2100674.
37. Ko, K.; Kim, S. H.; Park, S.; Han, H. S.; Lee, J. K.; Cha, J. W.; Hwang, S.; Choi, K. Y.; Song, Y. J.; Nam, S. J.; Shin, J.; Nam, S. I.; Kwon, H. C.; Park, J. S.; Oh, D. C. Discovery and photoisomerization of new pyrrolosterpenoids glaciapyrroles D and E, from deep-sea sediment *Streptomyces* sp. *Mar. Drugs* **2022**, *20*, (5), 281.
38. Liu, Y.; Ding, L.; Deng, Y.; Wang, X.; Cui, W.; He, S. Feature-based molecular networking-guided discovery of siderophores from a marine mesophotic

zone *Axinellida* sponge-associated actinomycete *Streptomyces diastaticus* NBU2966. *Phytochemistry* **2022**, 196, 113078.

39. Han, X.; Liu, Z.; Zhang, Z.; Zhang, X.; Zhu, T.; Gu, Q.; Li, W.; Che, Q.; Li, D. Geranylpyrrol A and piericidin F from *Streptomyces* sp. CHQ-64  $\Delta$ rdmF. *J. Nat. Prod.* **2017**, 80, (5), 1684-1687.
40. Zhou, X.; Liang, Z.; Li, K.; Fang, W.; Tian, Y.; Luo, X.; Chen, Y.; Zhan, Z.; Zhang, T.; Liao, S.; Liu, S.; Liu, Y.; Fenical, W.; Tang, L. Exploring the natural piericidins as anti-renal cell carcinoma agents targeting peroxiredoxin 1. *J. Med. Chem.* **2019**, 62, (15), 7058-7069.
41. Peng, J.; Zhang, Q.; Jiang, X.; Ma, L.; Long, T.; Cheng, Z.; Zhang, C.; Zhu, Y. New piericidin derivatives from the marine-derived *Streptomyces* sp. SCSIO 40063 with cytotoxic activity. *Nat. Prod. Res.* **2022**, 36, (10), 2458-2464.
42. Hassan, H. M.; Boonlarppradab, C.; Fenical, W. Actinoquinolines A and B, anti-inflammatory quinoline alkaloids from a marine-derived *Streptomyces* sp., strain CNP975. *J. Antibiot. (Tokyo)* **2016**, 69, (7), 511-4.
43. Ortiz-Lopez, F. J.; Alcalde, E.; Sarmiento-Vizcaino, A.; Diaz, C.; Cautain, B.; Garcia, L. A.; Blanco, G.; Reyes, F. New 3-hydroxyquinaldic acid derivatives from cultures of the marine derived actinomycete *Streptomyces cyaneofuscatus* M-157. *Mar. Drugs* **2018**, 16, (10), 371.
44. Mullowney, M. W.; E, O. h.; Shaikh, A.; Wei, X.; Tanouye, U.; Santarsiero, B. D.; Burdette, J. E.; Murphy, B. T. Diazaquinomycins E-G, novel diaza-anthracene analogs from a marine-derived *Streptomyces* sp. *Mar. Drugs* **2014**, 12, (6), 3574-3586.
45. Cheng, C.; Othman, E. M.; Reimer, A.; Grüne, M.; Kozjak-Pavlovic, V.; Stopper, H.; Hentschel, U.; Abdelmohsen, U. R. Ageloline A, new antioxidant and antichlamydial quinolone from the marine sponge-derived bacterium *Streptomyces* sp. SBT345. *Tetrahedron Lett.* **2016**, 57, (25), 2786-2789.
46. Shaaban, M.; Shaaban, K. A.; Kelter, G.; Fiebig, H. H.; Laatsch, H. Mansouramycins E–G, cytotoxic isoquinolinequinones from marine *Streptomyces*. *Mar. Drugs* **2021**, 19, (12), 715.
47. Yang, C. L.; Wang, Y. S.; Liu, C. L.; Zeng, Y. J.; Cheng, P.; Jiao, R. H.; Bao, S. X.; Huang, H. Q.; Tan, R. X.; Ge, H. M. Strepchazolins A and B: Two new alkaloids from a marine *Streptomyces chartreusis* NA02069. *Mar. Drugs* **2017**, 15, (8), 244.
48. Zhang, D.; Yi, W.; Ge, H.; Zhang, Z.; Wu, B. Bioactive streptoglutarimides A-J from the marine-derived *Streptomyces* sp. ZZ741. *J. Nat. Prod.* **2019**, 82, (10), 2800-2808.
49. Lee, D. S.; Yoon, C. S.; Jung, Y. T.; Yoon, J. H.; Kim, Y. C.; Oh, H. Marine-derived secondary metabolite, griseusrazin A, suppresses inflammation through heme oxygenase-1 induction in activated RAW264.7 macrophages. *J. Nat. Prod.* **2016**, 79, (4), 1105-11.
50. Shaala, L. A.; Youssef, D. T.; Badr, J. M.; Harakeh, S. M. Bioactive 2(1H)-pyrazinones and diketopiperazine alkaloids from a tunicate-derived actinomycete *Streptomyces* sp. *Molecules* **2016**, 21, (9), 1116.
51. Chen, M.; Chai, W.; Zhu, R.; Song, T.; Zhang, Z.; Lian, X. Streptopyrazinones A-D, rare metabolites from marine-derived *Streptomyces* sp. ZZ446.

*Tetrahedron* **2018**, 74, (16), 2100-2106.

52. Kim, S.; Hillman, P. F.; Lee, J. Y.; Lee, J.; Cha, S.-S.; Oh, D.-C.; Nam, S.-J.; Fenical, W. Actinopolymorphols E and F, pyrazine alkaloids from a marine sediment-derived bacterium *Streptomyces* sp. *J. Antibiot. (Tokyo)* **2022**, 75, (11), 619-625.
53. Ou, Y. X.; Huang, J. F.; Li, X. M.; Kang, Q. J.; Pan, Y. T. Three new 2,5-diketopiperazines from the fish intestinal *Streptomyces* sp. MNU FJ-36. *Nat. Prod. Res.* **2016**, 30, (15), 1771-5.
54. Yi, W.; Qin, L.; Lian, X. Y.; Zhang, Z. New antifungal metabolites from the Mariana Trench sediment-associated actinomycete *Streptomyces* sp. SY1965. *Mar. Drugs* **2020**, 18, (8), 385.
55. Buedenbender, L.; Grkovic, T.; Duffy, S.; Kurtböke, D. I.; Avery, V. M.; Carroll, A. R. Nasesezine C, a new anti-plasmodial dimeric diketopiperazine from a marine sediment derived *Streptomyces* sp. *Tetrahedron Lett.* **2016**, 57, (52), 5893-5895.
56. Shaala, L. A.; Youssef, D. T. A.; Badr, J. M.; Harakeh, S. M.; Genta-Jouve, G. Bioactive diketopiperazines and nucleoside derivatives from a sponge-derived *Streptomyces* species. *Mar. Drugs* **2019**, 17, (10), 584.
57. Chen, S.; Zhang, D.; Chen, M.; Zhang, Z.; Lian, X. Y. A rare diketopiperazine glycoside from marine-sourced *Streptomyces* sp. ZZ446. *Nat. Prod. Res.* **2020**, 34, (7), 1046-1050.
58. Ren, J.; Liu, D.; Tian, L.; Wei, Y.; Proksch, P.; Zeng, J.; Lin, W. Venezuelines A-G, new phenoxazine-based alkaloids and aminophenols from *Streptomyces venezuelae* and the regulation of gene target Nur77. *Bioorg. Med. Chem. Lett.* **2013**, 23, (1), 301-4.
59. Abdelfattah, M. S. A new bioactive aminophenoxazinone alkaloid from a marine-derived actinomycete. *Nat. Prod. Res.* **2013**, 27, (22), 2126-31.
60. Kunz, A. L.; Labes, A.; Wiese, J.; Bruhn, T.; Bringmann, G.; Imhoff, J. F. Nature's lab for derivatization: new and revised structures of a variety of streptophenazines produced by a sponge-derived *Streptomyces* strain. *Mar. Drugs* **2014**, 12, (4), 1699-1714.
61. Cheng, C.; Othman, E. M.; Fekete, A.; Krischke, M. Strepoxazine A, a new cytotoxic phenoxazin from the marine sponge-derived bacterium *Streptomyces* sp. SBT345. *Tetrahedron Lett.* **2016**, 57, (37), 4196-4199.
62. Wang, Q.; Zhang, Y.; Wang, M.; Tan, Y.; Hu, X.; He, H.; Xiao, C.; You, X.; Wang, Y.; Gan, M. Neo-actinomycins A and B, natural actinomycins bearing the 5H-oxazolo[4,5-b]phenoxazine chromophore, from the marine-derived *Streptomyces* sp. IMB094. *Sci. Rep.* **2017**, 7, (1), 3591.
63. Zhao, W.; Wang, G.; Guo, L.; Wang, J.; Jing, C.; Liu, B.; Zhao, F.; Zhang, S.; Xie, Z. Asp-containing actinomycin and tetracyclic chromophoric analogues from the *Streptomyces* sp. strain S22. *Org. Biomol. Chem.* **2023**, 21, (8), 1737-1743.
64. Jiang, Y.-J.; Li, J.-Q.; Zhang, H.-J.; Ding, W.-J.; Ma, Z.-J. Cyclizidine-type alkaloids from *Streptomyces* sp. HNA39. *J. Nat. Prod.* **2018**, 81, 394-399.
65. Cheng, X. W.; Li, J. Q.; Jiang, Y. J.; Liu, H. Z.; Huo, C. A new indolizinium alkaloid from marine-derived *Streptomyces* sp. HNA39. *J. Asian Nat. Prod.*

*Res.* **2021**, *23*, (9), 913-918.

66. Shi, Y.; Pan, C.; Auckloo, B. N.; Chen, X.; Chen, C. A.; Wang, K.; Wu, X.; Ye, Y.; Wu, B. Stress-driven discovery of a cryptic antibiotic produced by *Streptomyces* sp. WU20 from Kueishantao hydrothermal vent with an integrated metabolomics strategy. *Appl. Microbiol. Biotechnol.* **2017**, *101*, (4), 1395-1408.
67. Zhang, X.; Chen, L.; Chai, W.; Lian, X.-Y.; Zhang, Z. A unique indolizinium alkaloid streptopertusacin A and bioactive bafilomycins from marine-derived *Streptomyces* sp. HZP-2216E. *Phytochemistry* **2017**, *144*, 119-126.
68. Fu, P.; MacMillan, J. B. Spithioneines A and B, two new bohemamine derivatives possessing ergothioneine moiety from a marine-derived *Streptomyces spinoverrucosus*. *Org. Lett.* **2015**, *17*, (12), 3046-9.
69. Fu, P.; La, S.; MacMillan, J. B. 1,3-oxazin-6-one derivatives and bohemamine-type pyrrolizidine alkaloids from a marine-derived *Streptomyces spinoverrucosus*. *J. Nat. Prod.* **2016**, *79*, (3), 455-62.
70. Fu, P.; Legako, A.; La, S.; MacMillan, J. B. Discovery, Characterization, and Analogue Synthesis of Bohemamine Dimers Generated by Non-enzymatic Biosynthesis. *Chemistry* **2016**, *22*, (10), 3491-3495.
71. Fu, P.; Johnson, M.; Chen, H.; Posner, B. A.; MacMillan, J. B. Carpatamides A-C, cytotoxic arylamine derivatives from a marine-derived *Streptomyces* sp. *J. Nat. Prod.* **2014**, *77*, (5), 1245-8.
72. Zhang, W.; Che, Q.; Tan, H.; Qi, X.; Li, J.; Li, D.; Gu, Q.; Zhu, T.; Liu, M. Marine *Streptomyces* sp. derived antimycin analogues suppress HeLa cells via depletion HPV E6/E7 mediated by ROS-dependent ubiquitin-proteasome system. *Sci. Rep.* **2017**, *7*, 42180.
73. Hu, C.; Zhou, S. W.; Chen, F.; Zheng, X. H.; Shen, H. F.; Lin, B. R.; Zhou, G. X. Neoantimycins A and B, two unusual benzamido nine-membered dilactones from marine-derived *Streptomyces antibioticus* H12-15. *Molecules* **2017**, *22*, (4), 557.
74. Chen, L.; Chai, W.; Wang, W.; Song, T.; Lian, X. Y.; Zhang, Z. Cytotoxic bagremycins from mangrove-derived *Streptomyces* sp. Q22. *J. Nat. Prod.* **2017**, *80*, (5), 1450-1456.
75. Zhang, D.; Shu, C.; Lian, X.; Zhang, Z. New antibacterial bagremycins F and G from the marine-derived *Streptomyces* sp. ZZ745. *Mar. Drugs* **2018**, *16*, (9), 330.
76. Hamed, A.; Abdel-Razek, A. S.; Frese, M.; Wibberg, D.; El-Haddad, A. F.; Ibrahim, T. M. A.; Kalinowski, J.; Sewald, N.; Shaaban, M. N-Acetylborrelidin B: a new bioactive metabolite from *Streptomyces mutabilis* sp. MII. *Z. Naturforsch. C* **2018**, *73*, (1-2), 49-57.
77. Lacret, R.; Oves-Costales, D.; Gómez, C.; Díaz, C.; de la Cruz, M.; Pérez-Victoria, I.; Vicente, F.; Genilloud, O.; Reyes, F. New ikarugamycin derivatives with antifungal and antibacterial properties from *Streptomyces zhaozhouensis*. *Mar. Drugs* **2014**, *13*, (1), 128-140.

78. Saha, S.; Zhang, W.; Zhang, G.; Zhu, Y.; Chen, Y.; Liu, W.; Yuan, C.; Zhang, Q.; Zhang, H.; Zhang, L.; Zhang, W.; Zhang, C. Activation and characterization of a cryptic gene cluster reveals a cyclization cascade for polycyclic tetramate macrolactams. *Chem. Sci.* **2017**, *8*, (2), 1607-1612.
79. Fukudaa, T.; Takahashia, M.; Kasaib, H.; Nagaia, K.; Tomodaa, H. Chlokamycin, a new chloride from the marine-derived *Streptomyces* sp. MA2-12. *Nat. Prod. Commun.* **2017**, *12*, (8), 1223-1226.
80. Liu, W.; Zhang, W.; Jin, H.; Zhang, Q.; Chen, Y.; Jiang, X.; Zhang, G.; Zhang, L.; Zhang, W.; She, Z.; Zhang, C. Genome mining of marine-derived *Streptomyces* sp. SCSIO 40010 leads to cytotoxic new polycyclic tetramate macrolactams. *Mar. Drugs* **2019**, *17*, (12), 663.
81. Kawahara, T.; Fujiwara, T.; Kagaya, N.; Shin-Ya, K. JBIR-150, a novel 20-membered polyene macrolactam from marine-derived *Streptomyces* sp. OPMA00071. *J. Antibiot. (Tokyo)* **2018**, *71*, (3), 390-392.
82. Shin, Y. H.; Im, J. H.; Kang, I.; Kim, E.; Jang, S. C.; Cho, E.; Shin, D.; Hwang, S.; Du, Y. E.; Huynh, T. H.; Ko, K.; Ko, Y. J.; Nam, S. J.; Awakawa, T.; Lee, J.; Hong, S.; Abe, I.; Moore, B. S.; Fenical, W.; Yoon, Y. J.; Cho, J. C.; Lee, S. K.; Oh, K. B.; Oh, D. C. Genomic and spectroscopic signature-based discovery of natural macrolactams. *J. Am. Chem. Soc.* **2023**, *145*, (3), 1886-1896.
83. Shen, J.; Wang, J.; Chen, H.; Wang, Y.; Zhu, W.; Fu, P. Cyclamenols E and F, two diastereoisomeric bicyclic macrolactams with a cyclopentane moiety from an Antarctic *Streptomyces* species. *Org. Chem. Front.* **2020**, *7*, (2), 310-317.
84. Yang, F.; Sang, M.; Lu, J. R.; Zhao, H. M.; Zou, Y.; Wu, W.; Yu, Y.; Liu, Y. W.; Ma, W.; Zhang, Y.; Zhang, W.; Lin, H. W. Somalactams A-D: Anti-inflammatory macrolide lactams with unique ring systems from an Arctic actinomycete strain. *Angew. Chem. Int. Ed. Engl.* **2023**, *62*, (18), e202218085.
85. Hu, Y.; Wang, M.; Wu, C.; Tan, Y.; Li, J.; Hao, X.; Duan, Y.; Guan, Y.; Shang, X.; Wang, Y.; Xiao, C.; Gan, M. Identification and proposed relative and absolute configurations of niphimycins C-E from the marine-derived *Streptomyces* sp. IMB7-145 by genomic analysis. *J. Nat. Prod.* **2018**, *81*, (1), 178-187.
86. Kim, D.; Lee, E. J.; Lee, J.; Leutou, A. S.; Shin, Y. H.; Choi, B.; Hwang, J. S.; Hahn, D.; Choi, H.; Chin, J.; Cho, S. J.; Hong, Y. D.; Ko, J.; Seong, C. N.; Maloney, K. N.; Oh, D. C.; Yang, I.; Hwang, H.; Nam, S. J. Antartin, a cytotoxic zizaane-type sesquiterpenoid from a *Streptomyces* sp. isolated from an Antarctic marine sediment. *Mar. Drugs* **2018**, *16*, (4), 130.
87. Liu, W.; Ma, L.; Zhang, L.; Chen, Y.; Zhang, Q.; Zhang, H.; Zhang, W.; Zhang, C.; Zhang, W. Two new phenylhydrazone derivatives from the Pearl River Estuary sediment-derived *Streptomyces* sp. SCSIO 40020. *Mar. Drugs* **2022**, *20*, (7), 449.
